# Supplementary material for: Novel Tdp1 Inhibitors Based on Adamantane Connected with Monoterpene Moieties via Heterocyclic Fragments
Source: MDPI journal article supplement (doi:10.3390/molecules26113128), 2021-05-24
Supplement: s1 [file s1]

# Novel Tdp1 inhibitors based on adamantane connected with monoterpene moieties via heterocyclic fragments

Aldar A. Munkuev <sup>1</sup>, Evgenii S. Mozhaitsev <sup>1</sup>, Arina A. Chepanova<sup>2</sup>, Evgeniy V. Suslov <sup>1</sup>, Dina V. Korchagina <sup>1</sup>, Olga D. Zakharova<sup>2</sup>, Ekaterina S. Ilina<sup>2</sup>, Nadezhda S. Dyrkheeva<sup>2</sup>, Alexandra L. Zakharenko <sup>2</sup>, Jóhannes Reynisson <sup>3\*</sup>, Konstantin P. Volcho <sup>1</sup>, Nariman F. Salakhutdinov <sup>1</sup> and Olga I. Lavrik <sup>2</sup>

<sup>1</sup> N.N. Vorozhtsov Novosibirsk Institute of Organic Chemistry, Siberian Branch of Russian Academy of Sciences, 9, Lavrentiev Ave., Novosibirsk 630090, Russia

<sup>2</sup> Institute of Chemical Biology and Fundamental Medicine, Siberian Branch of Russian Academy of Sciences, 8, Lavrentiev Ave., Novosibirsk 630090, Russia

<sup>3</sup> School of Pharmacy and Bioengineering, Keele University, Hornbeam Building, Staffordshire ST5 5BG, UK

\*Correspondence: j.reynisson@keele.ac.uk; Tel.: +44-(0)-178-2733-985

## Supporting Information

### Table of Contents

|                         |                                                                                                                                                                                                |            |
|-------------------------|------------------------------------------------------------------------------------------------------------------------------------------------------------------------------------------------|------------|
| <b>Figure S1</b>        | The molecular structures of pharmaceuticals containing 1,2,4-triazole or 1,3,4-thiadiazole moieties.                                                                                           | Page 2     |
| <b>Figure S2</b>        | Dose-dependent impact of the Tdp1 inhibitors on the viability of HeLa (a), HCT-116 (b), and SW837 (c) cells.                                                                                   | Pages 2-3  |
| <b>Figure S3</b>        | Combination index plot determined for combined action of 20g and topotecan on HCT-116 cells.                                                                                                   | Page 3     |
| <b>Figure S4a</b>       | The correlation of the IC <sub>50</sub> values of the ligands <b>20a</b> , <b>20b</b> and <b>20c</b> with log P.                                                                               | Page4      |
| <b>Figure S4b</b>       | The correlation of the IC <sub>50</sub> values of the ligands with MW.                                                                                                                         | Page 4     |
| <b>Figures S5 - S40</b> | NMR and mass spectra of the ligands                                                                                                                                                            | Pages 5 23 |
| <b>Table S1</b>         | The binding affinities as predicted by the scoring functions used.                                                                                                                             | Page 24    |
| <b>Table S2</b>         | The molecular descriptors and their corresponding Known Drug Indexes 2a and 2b (KDI <sub>2a/2b</sub> ). The R <sup>2</sup> numbers derived do not contain the IC <sub>50</sub> > 15 μM values. | Page 25    |
| <b>Table S3</b>         | Definition of lead-like, drug-like and Known Drug Space (KDS) in terms of molecular descriptors. The values given are the maxima for each descriptor for the volumes of chemical space used.   | Page 25    |

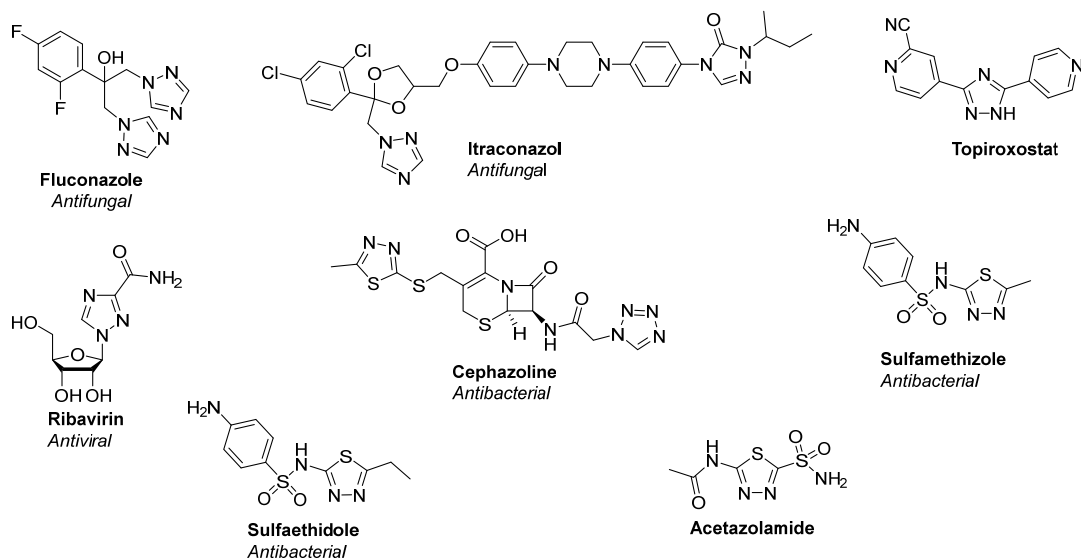

**Figure S1.** The molecular structures of pharmaceuticals containing 1,2,4-triazole or 1,3,4-thiadiazole moieties.

a)

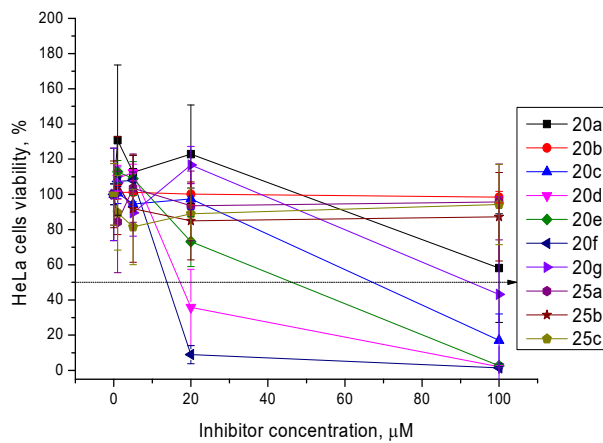

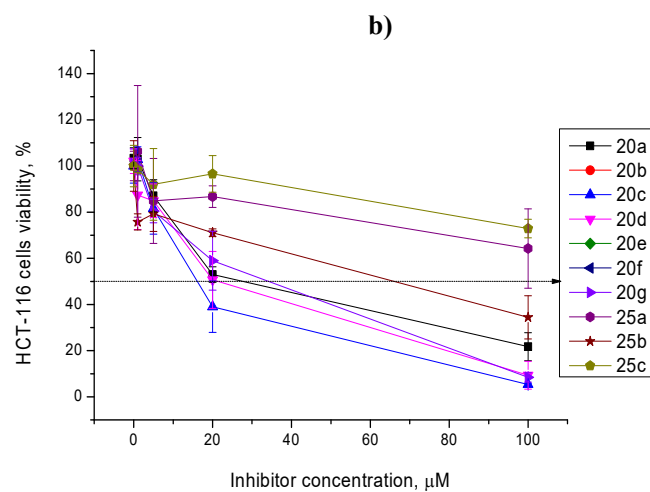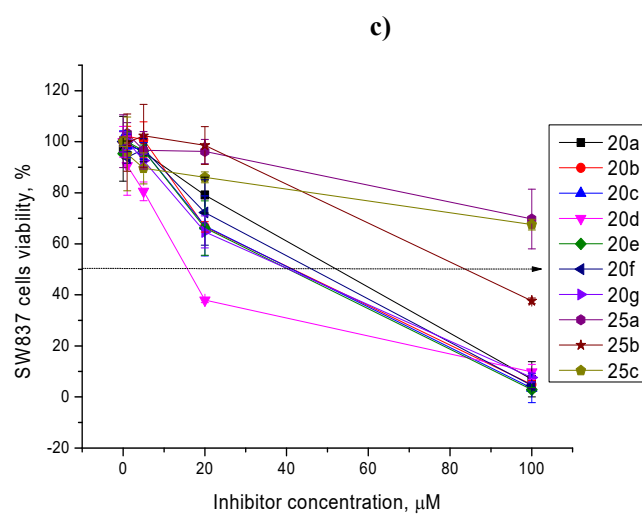

**Figure S2.** Dose-dependent impact of the Tdp1 inhibitors on the viability of HeLa (a), HCT-116 (b), and SW837 (c) cells.

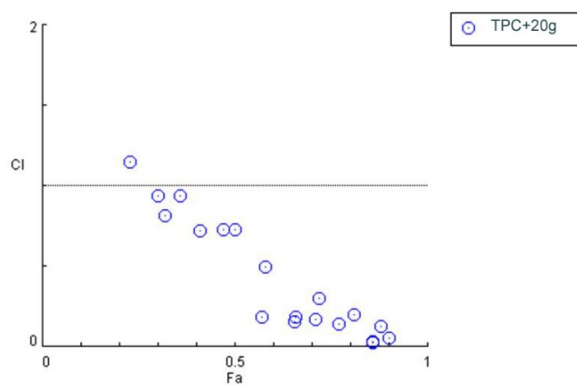

**Figure S3.** Combination index plot determined for combined action of 20g and topotecan on HCT-116 cells.

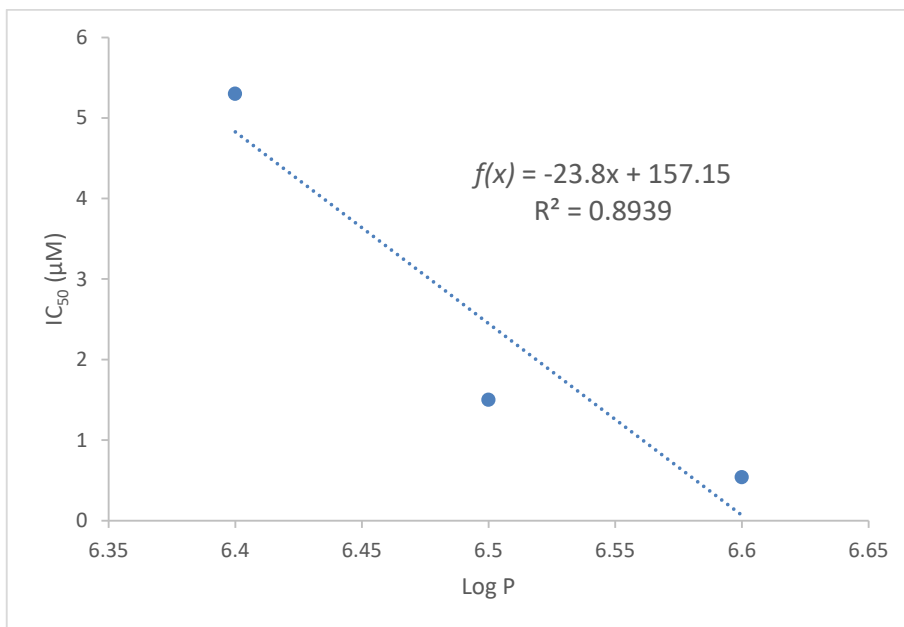

**A**

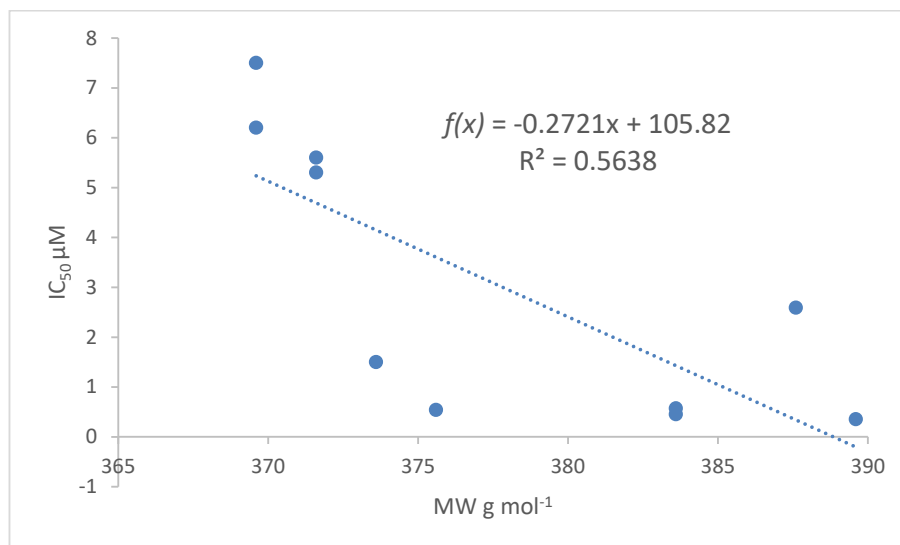

**B**

**Figure S4.** A) The correlation of the  $IC_{50}$  values of the ligands **20a**, **20b** and **20c** with  $\log P$ .  
B) The correlation of the  $IC_{50}$  values of the ligands with MW.

**Figure S5:**  $^1\text{H}$  NMR of compound **20a**

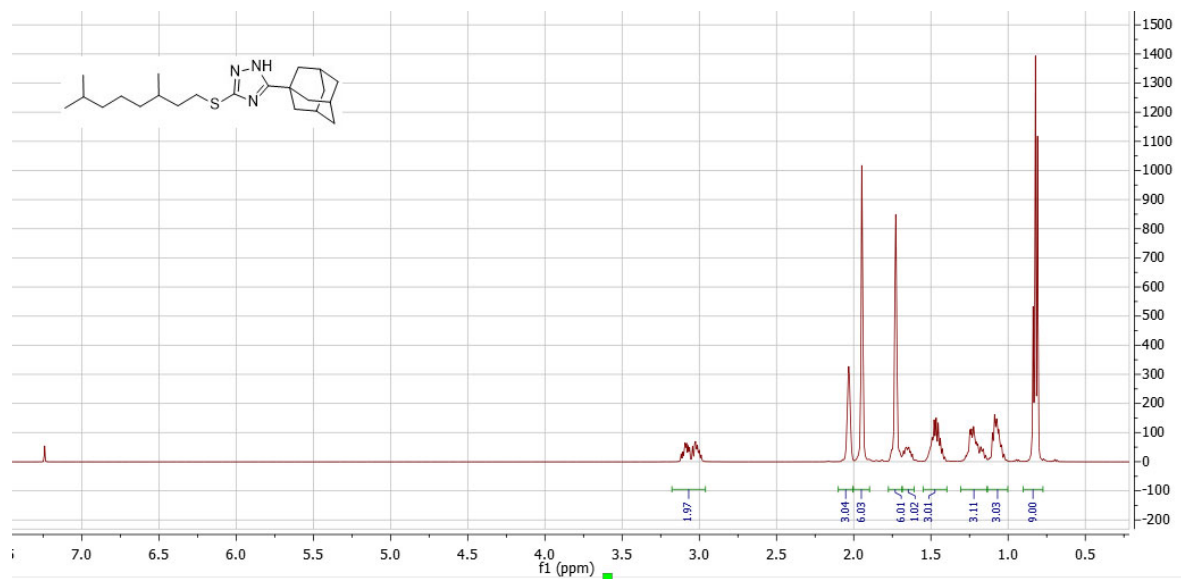

**Figure S6:**  $^{13}\text{C}$  NMR of compound **20a**

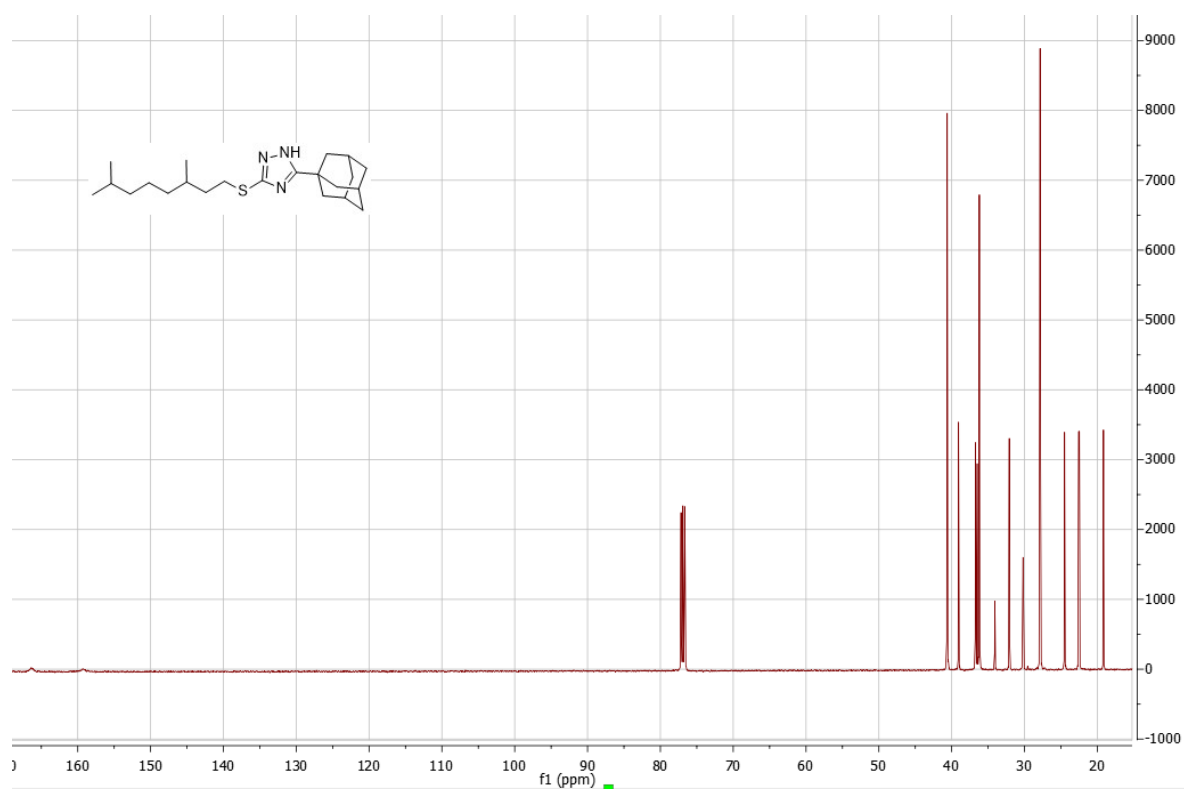

**Figure S7:** DFS spectrum of compound **20a**

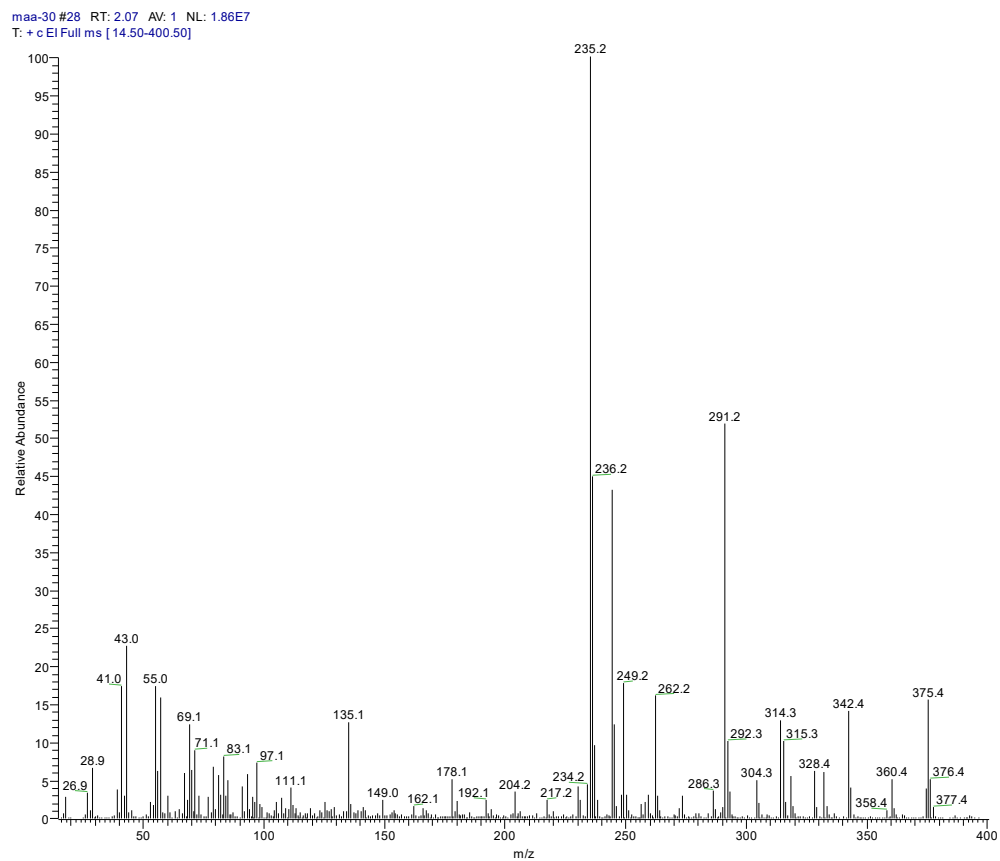

**Figure S8:**  $^1\text{H}$  NMR of compound **20b**

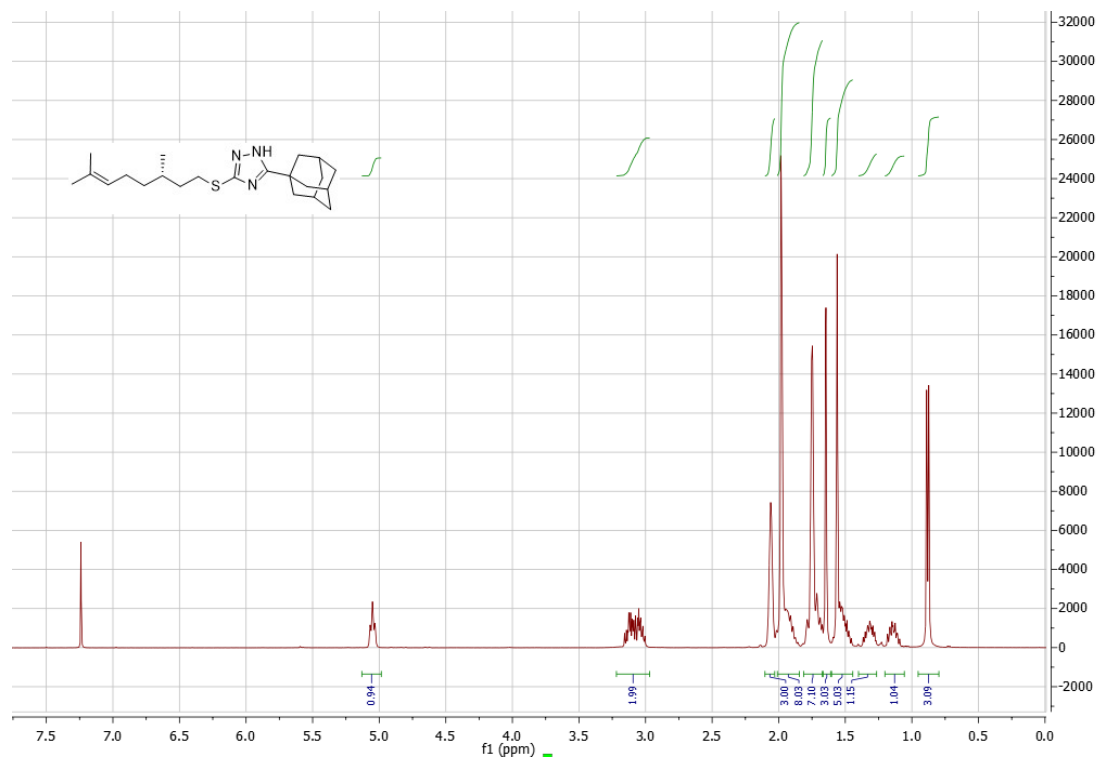

**Figure S9:**  $^{13}\text{C}$  NMR of compound **20b**

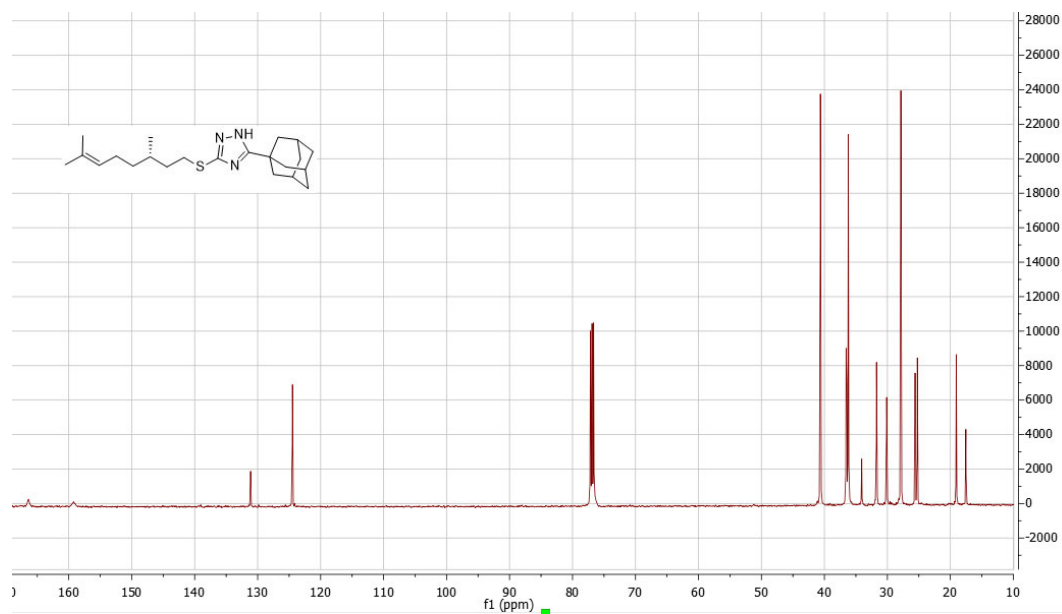

**Figure S10: DFS spectrum of compound 20b**

maa-49 #7 RT: 0.33 AV: 1 NL: 2.21E7  
T: + c EI Full ms [32.50-400.50]

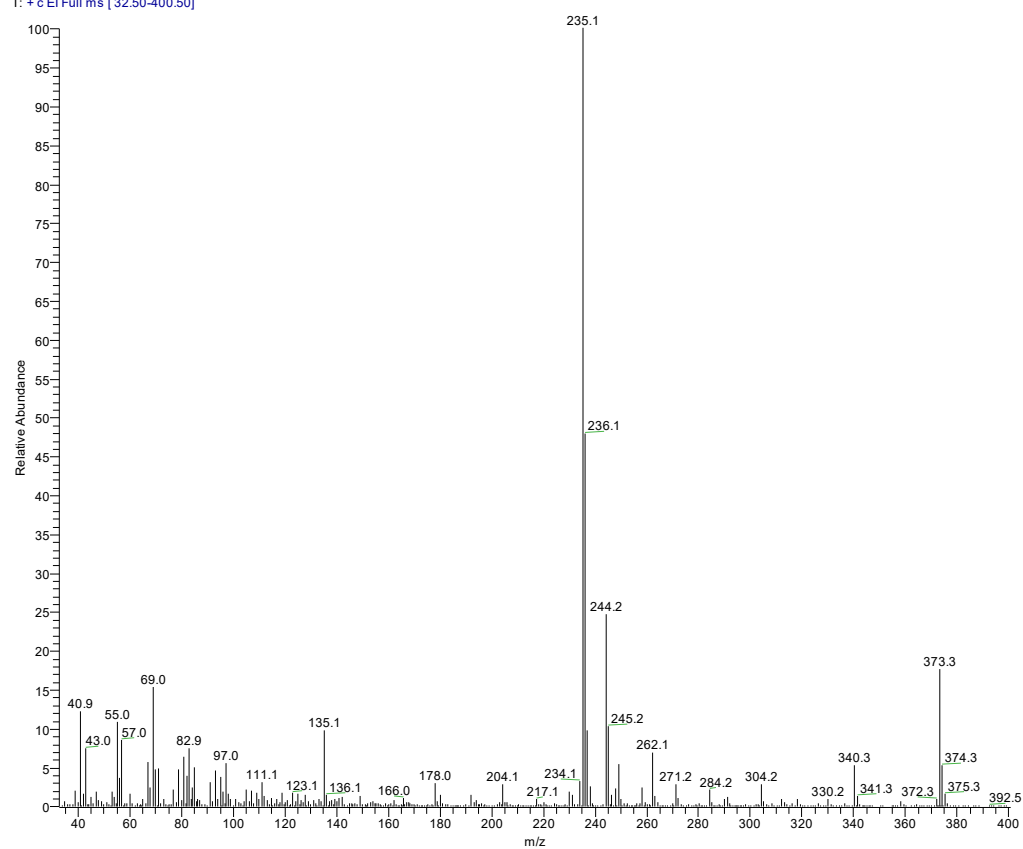

**Figure S11:  $^1\text{H}$  NMR of compound 20c**

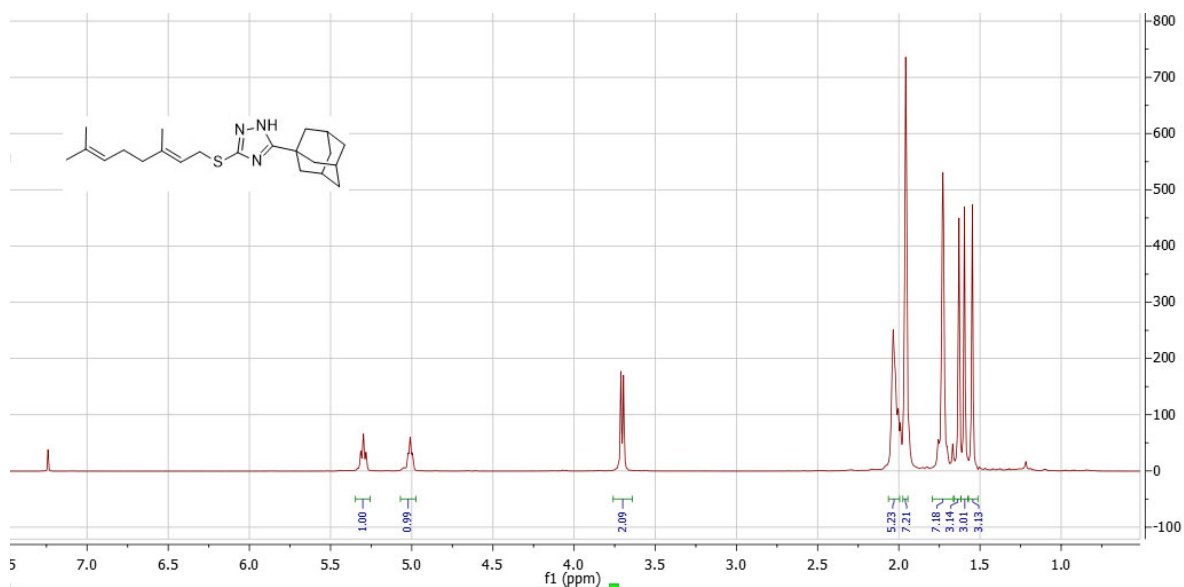



**Figure S12:**  $^{13}\text{C}$  NMR of compound **20c**

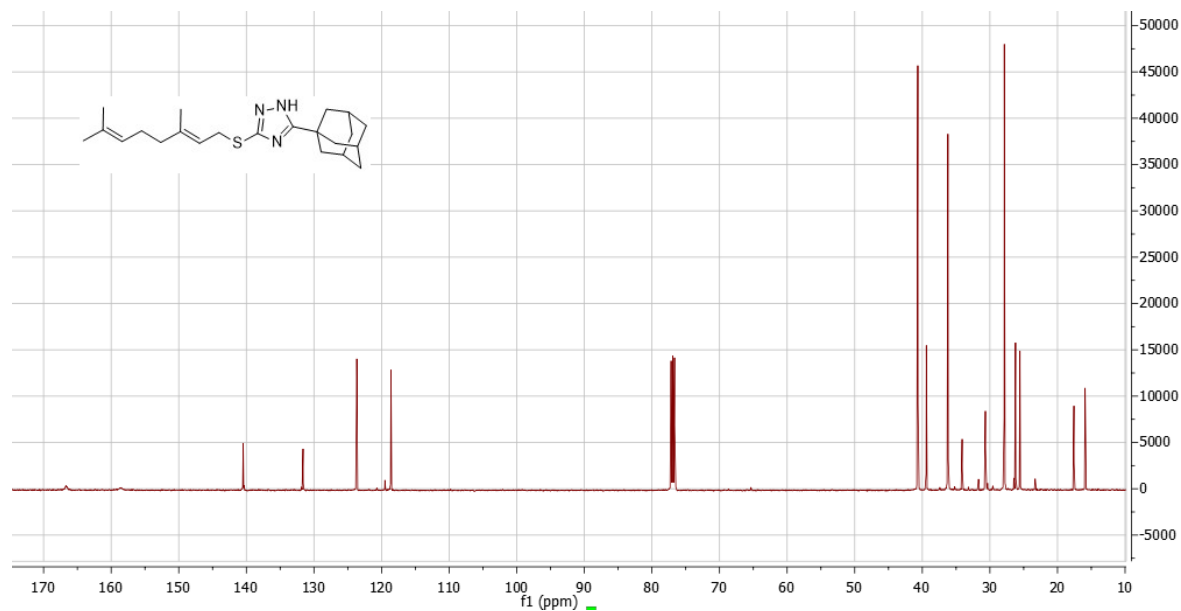

**Figure S13:** DFS spectrum of compound **20c**

maa-14 #40 RT: 2.46 AV: 1 NL: 6.93E7  
T: + c EI Full ms [32.50-400.50]

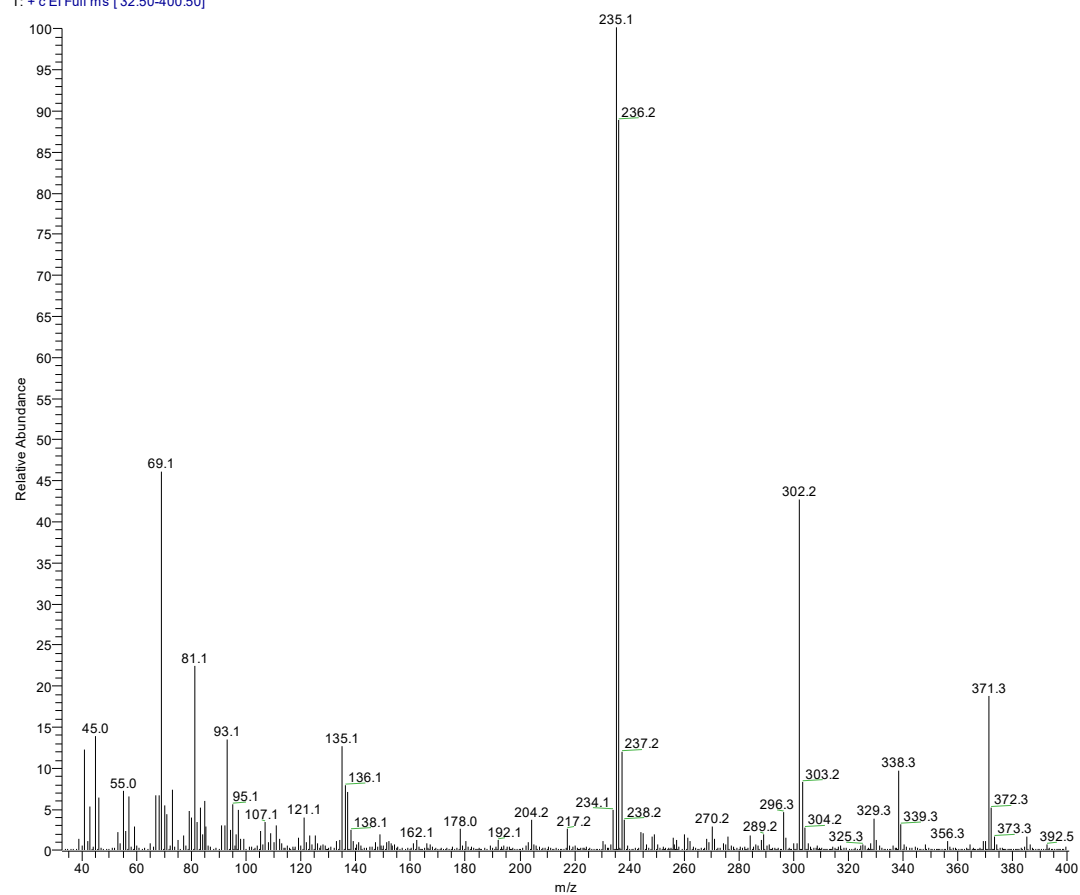

**Figure S14:**  $^1\text{H}$  NMR of compound **20d**

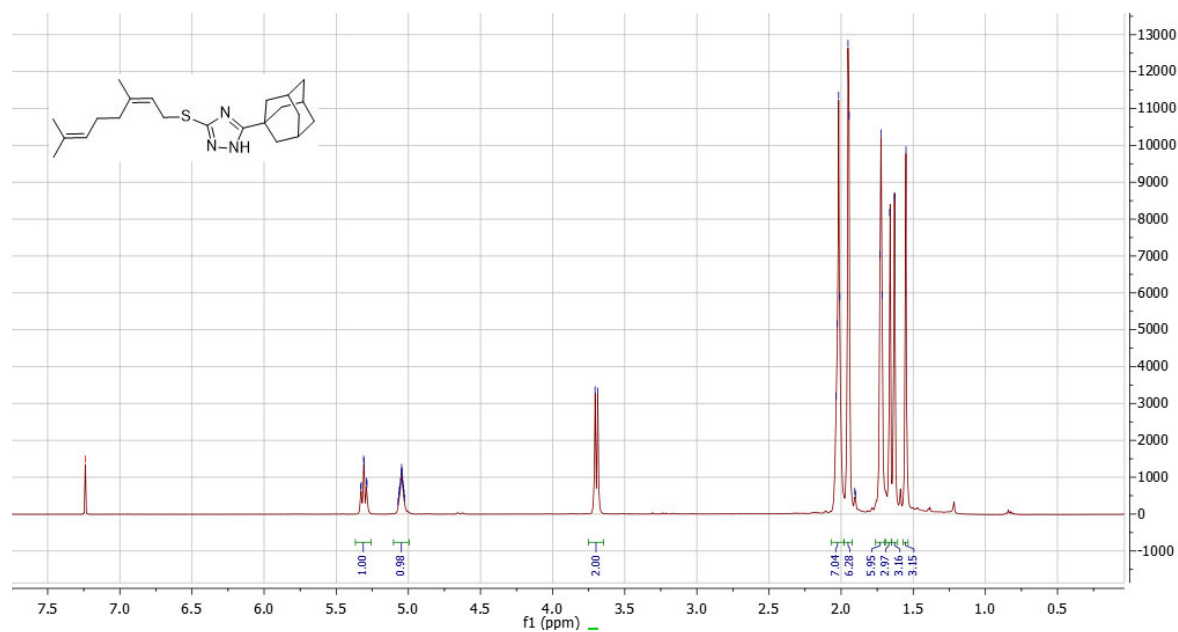

**Figure S15:**  $^{13}\text{C}$  NMR of compound **20d**

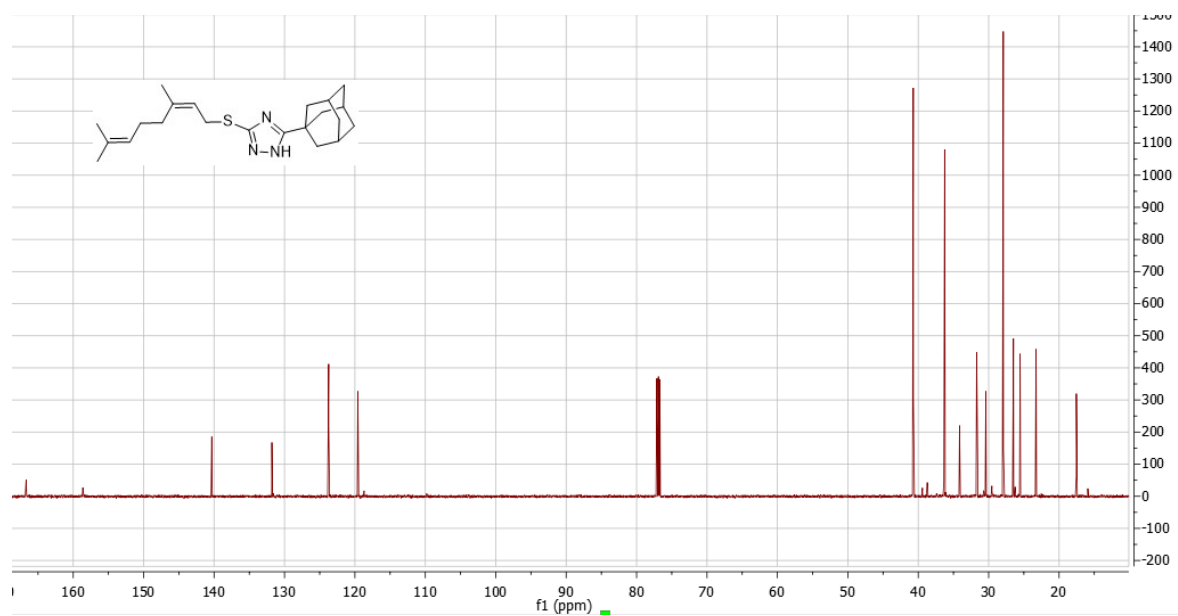

**Figure S16:** DFS spectrum of compound **20d**

maa-54 #33 RT: 2.43 AV: 1 NL: 1.17E7  
T: + c EI Full ms [ 14.50-400.50]

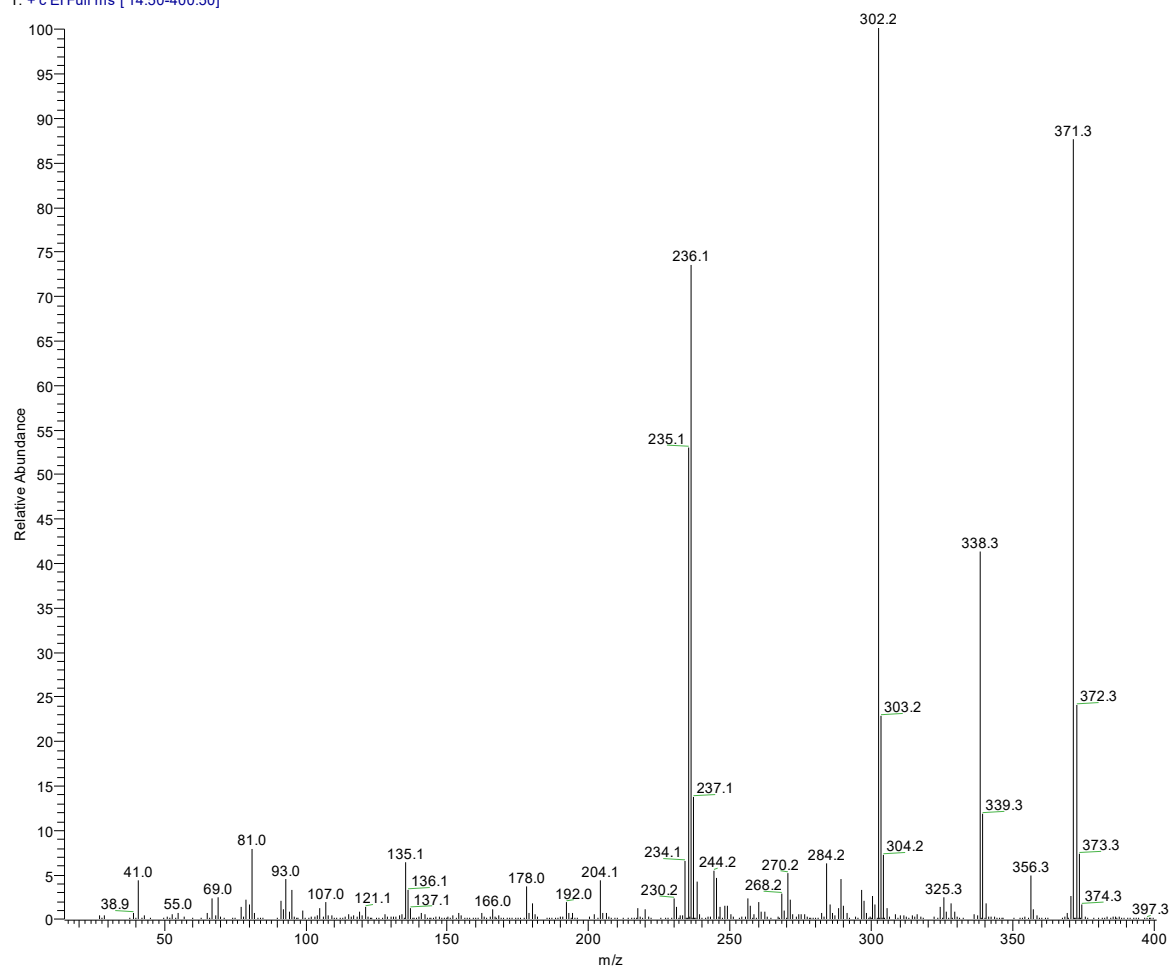

**Figure S17:**  $^1\text{H}$  NMR of compound **20e**

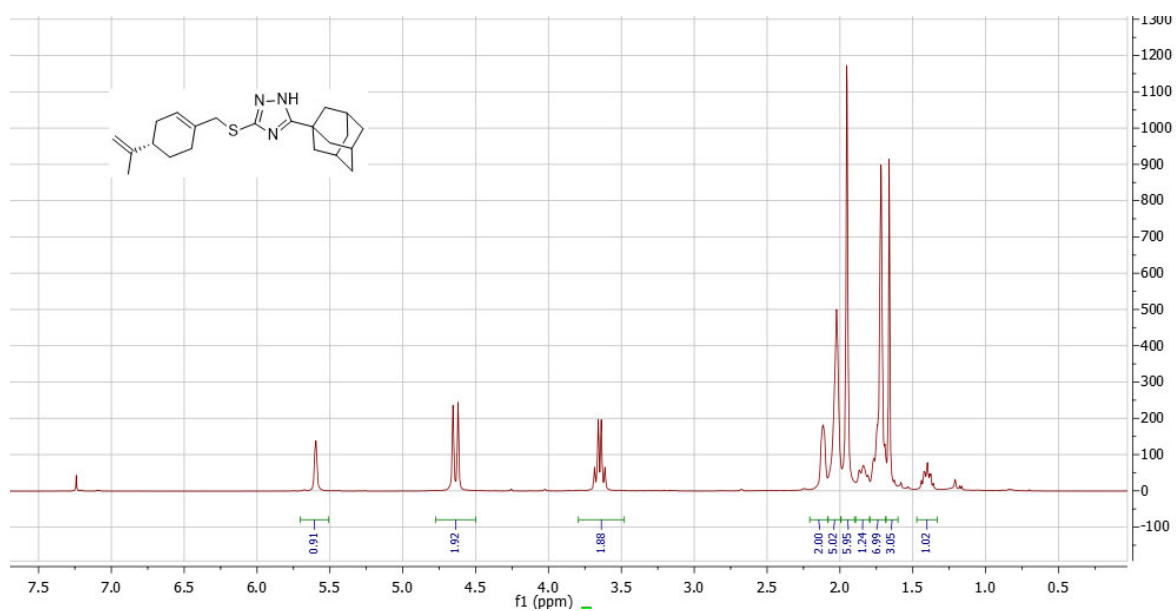

**Figure S18:**  $^{13}\text{C}$  NMR of compound **20e**

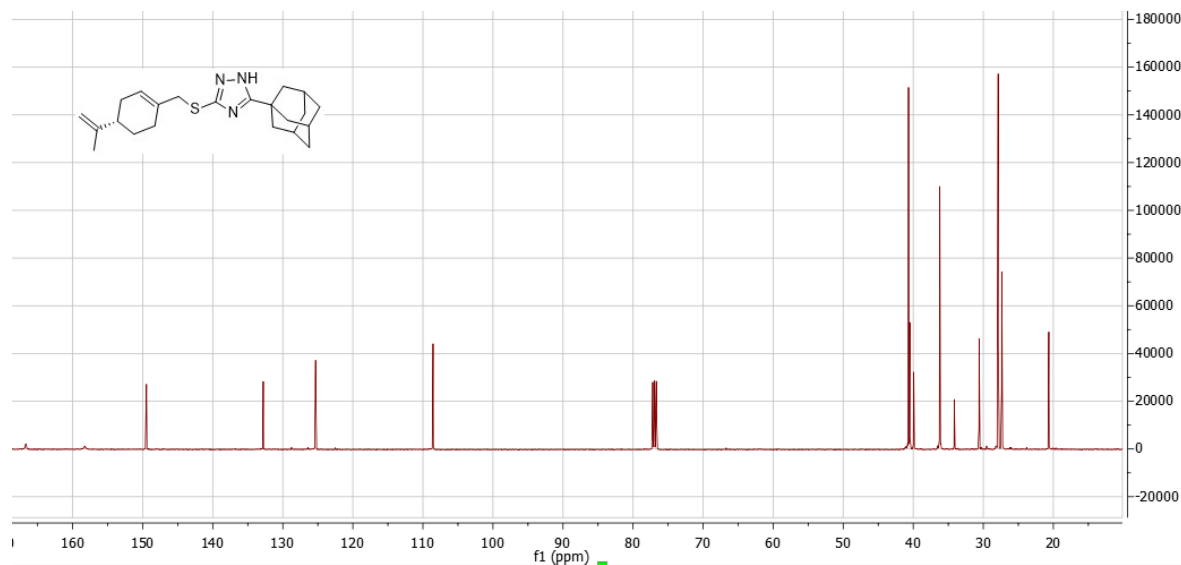

**Figure S19:** DFS spectrum of compound **20e**

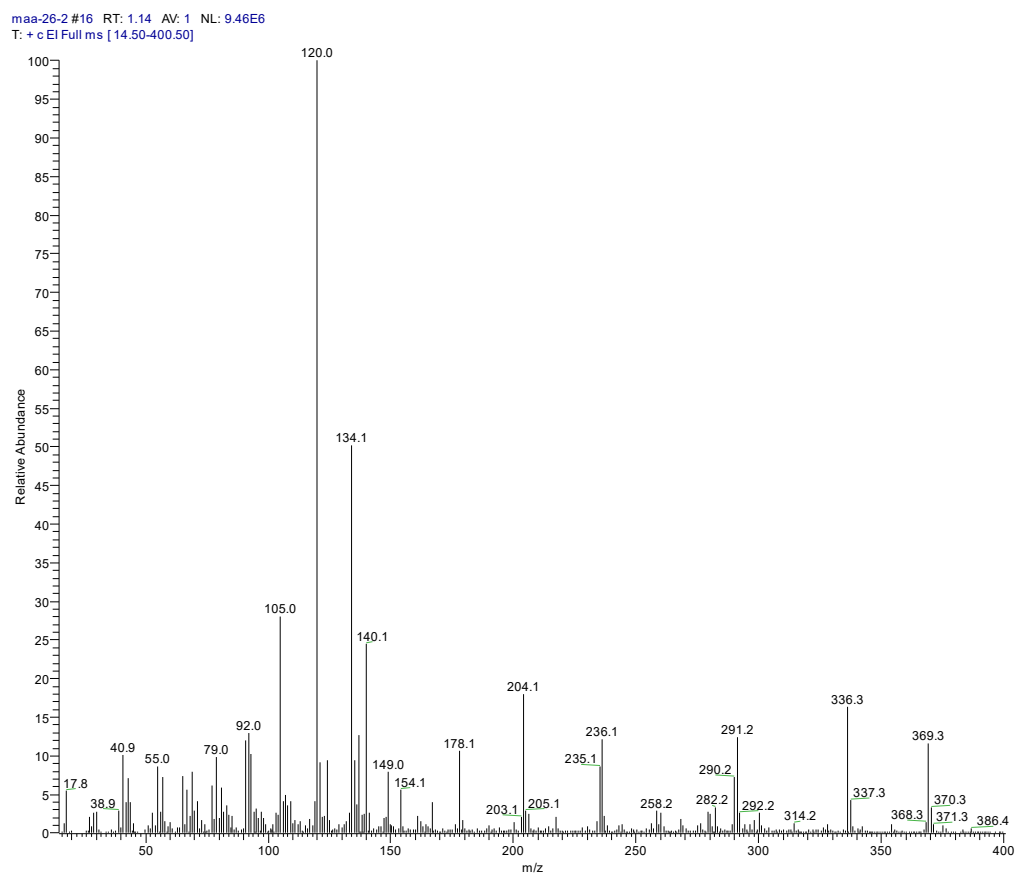

**Figure S20:**  $^1\text{H}$  NMR of compound **20f**

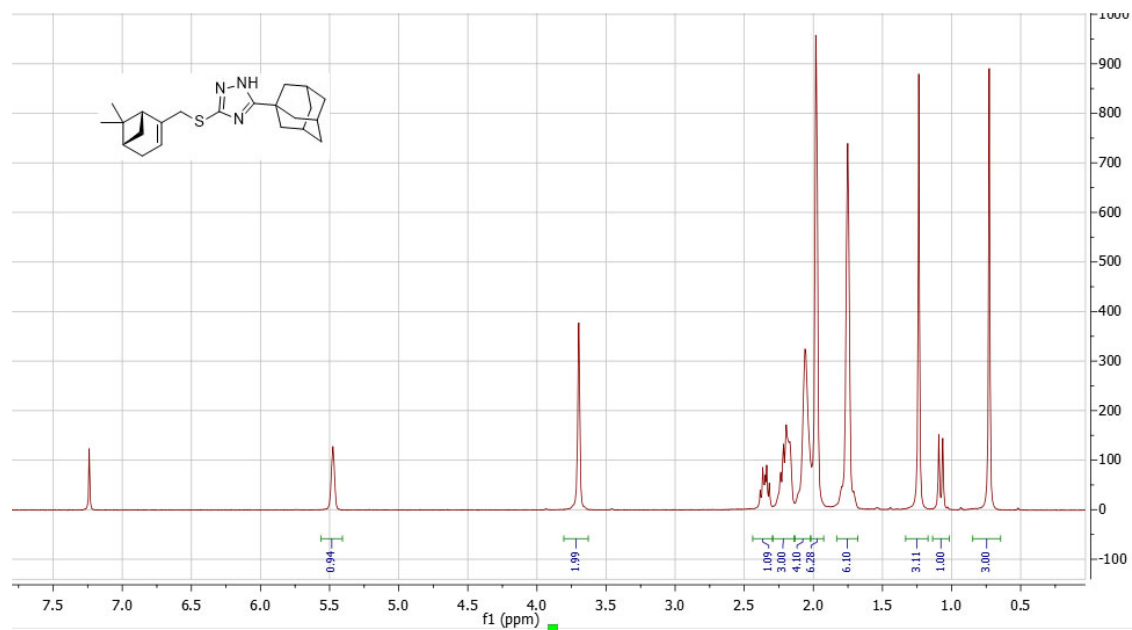

**Figure S21:**  $^{13}\text{C}$  NMR of compound **20f**

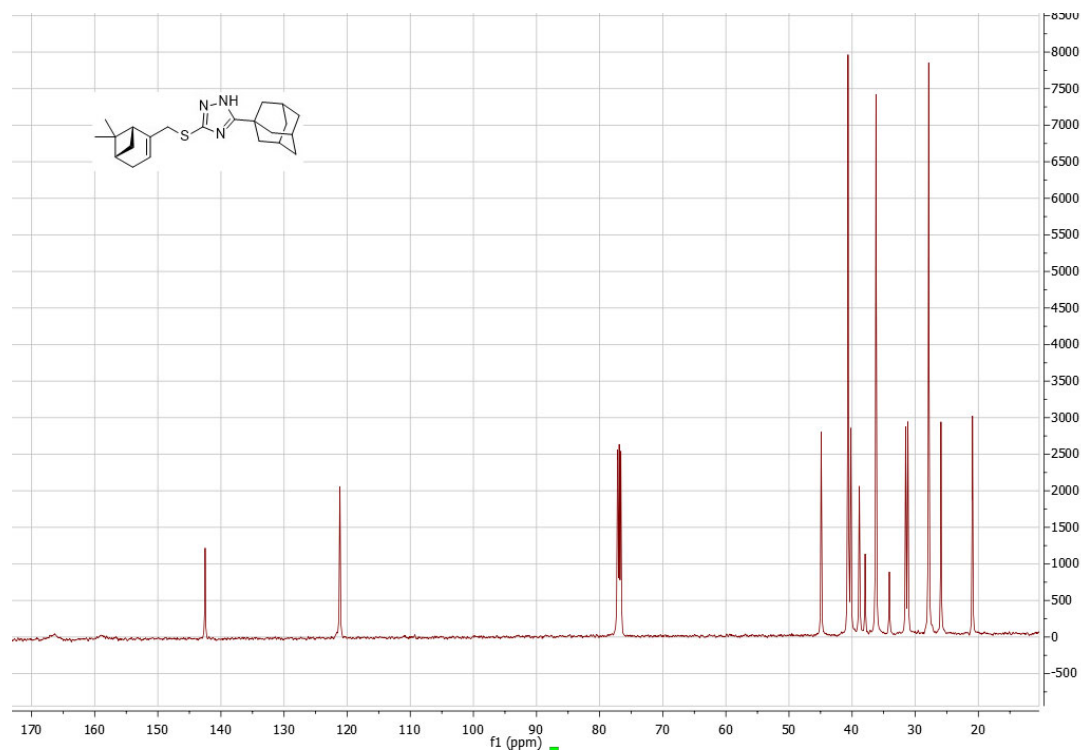

**Figure S22: DFS spectrum of compound 20f**

maa-32\_ #1699 RT: 10.74 AV: 1 NL: 2.25E7  
T: + c EI Full ms [14.50-382.50]

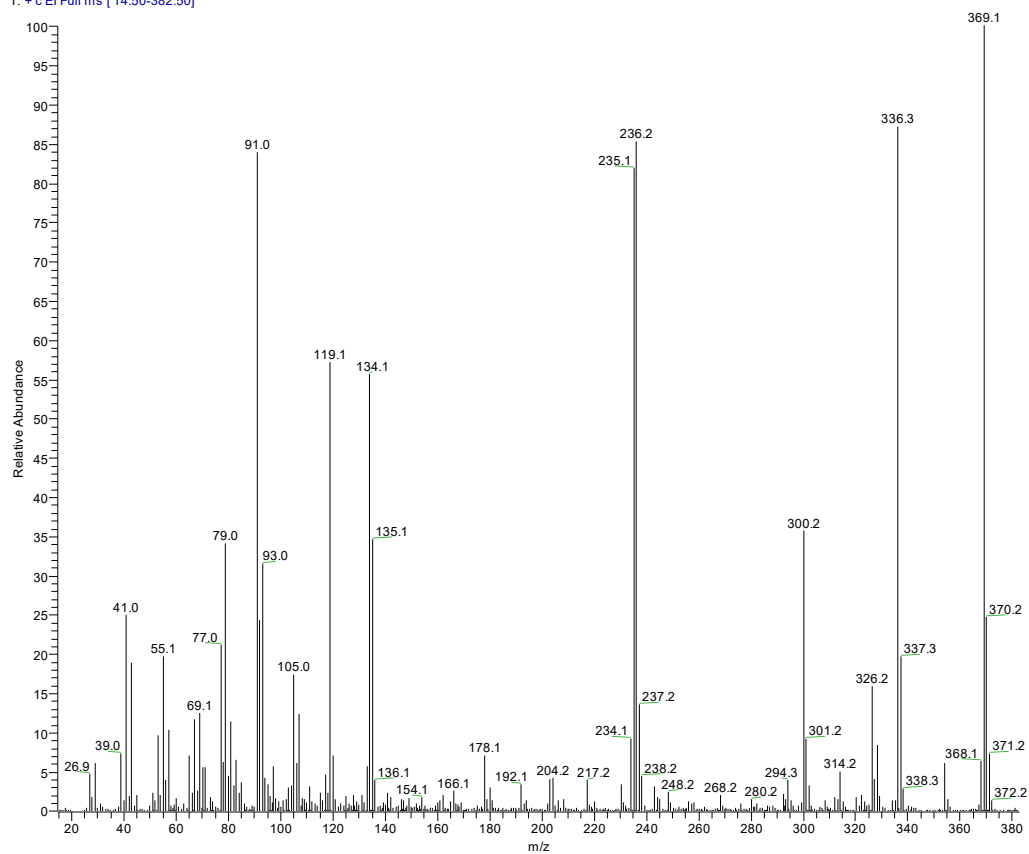

**Figure S23:  $^1\text{H}$  NMR of compound 20g**

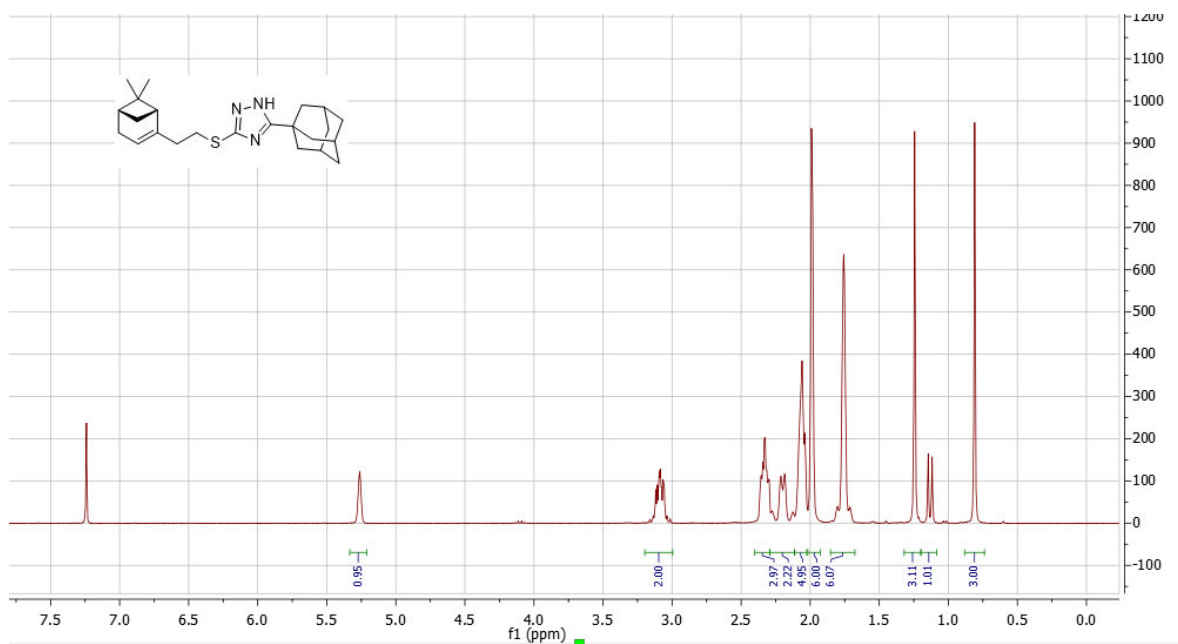

**Figure S24:**  $^{13}\text{C}$  NMR of compound **20g**

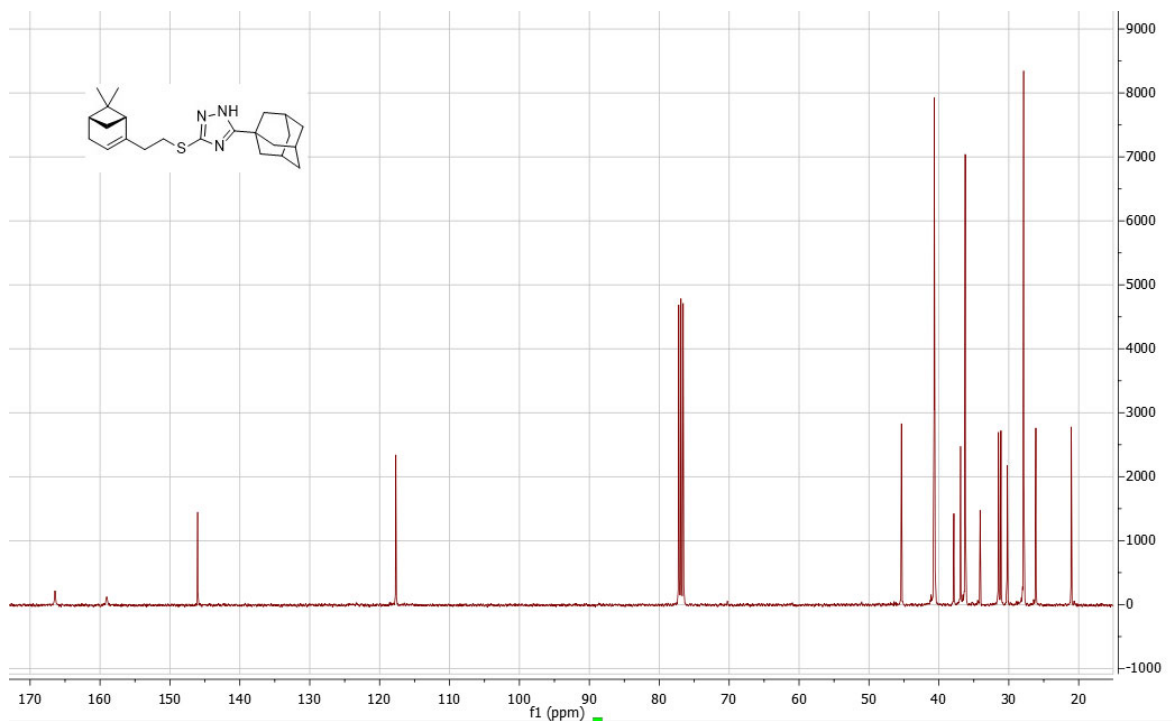

**Figure S25:** DFS spectrum of compound **20g**

maa-47 #39 RT: 2.85 AV: 1 NL: 2.32E7  
T: + c EI Full ms [32.50-400.50]

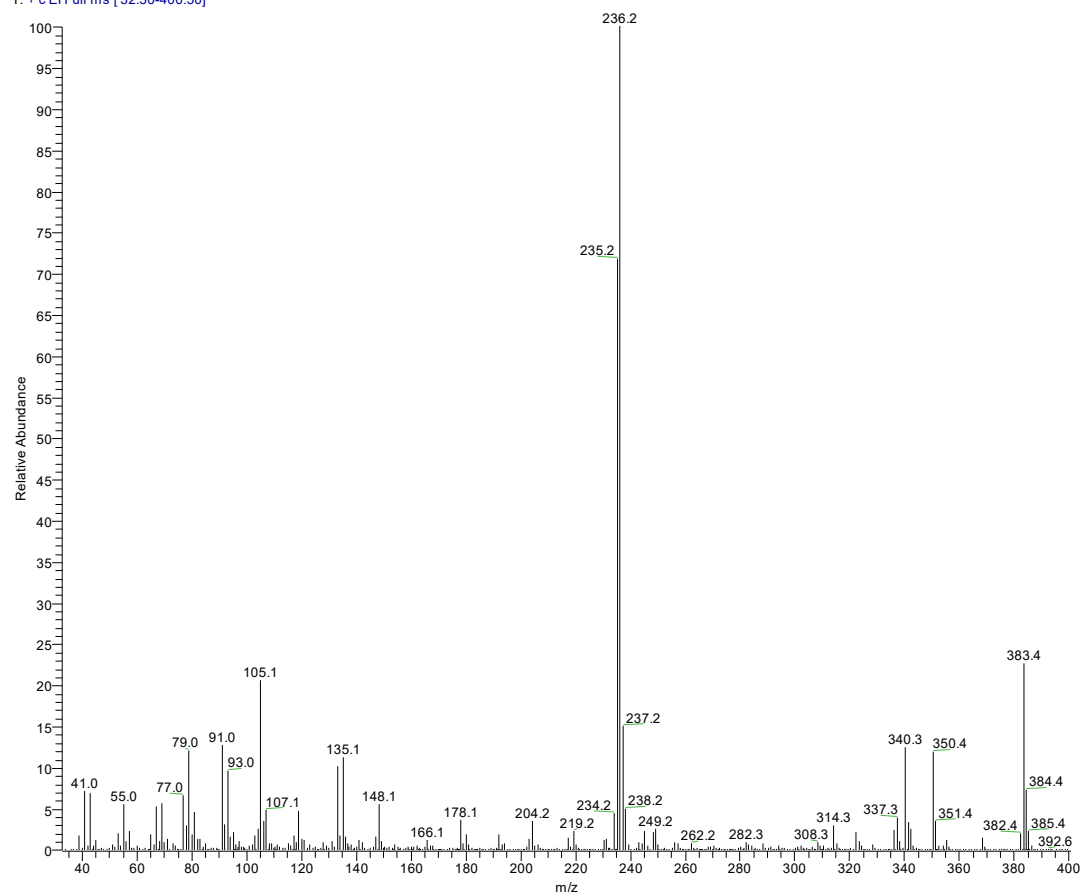

**Figure S26:**  $^1\text{H}$  NMR of compound **25a**

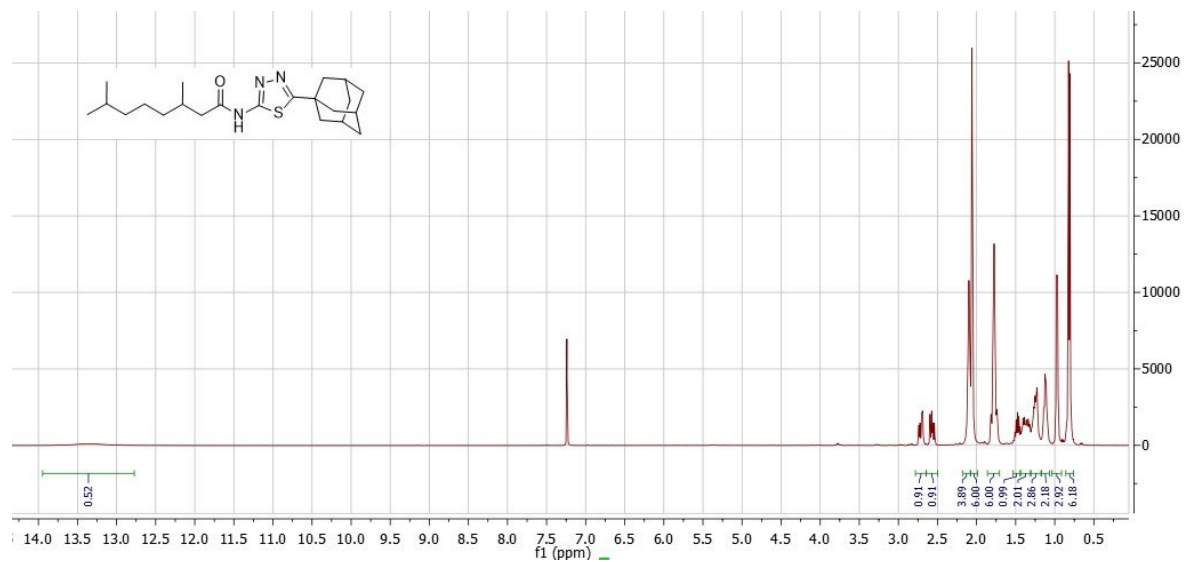

**Figure S27:**  $^{13}\text{C}$  NMR of compound **25a**

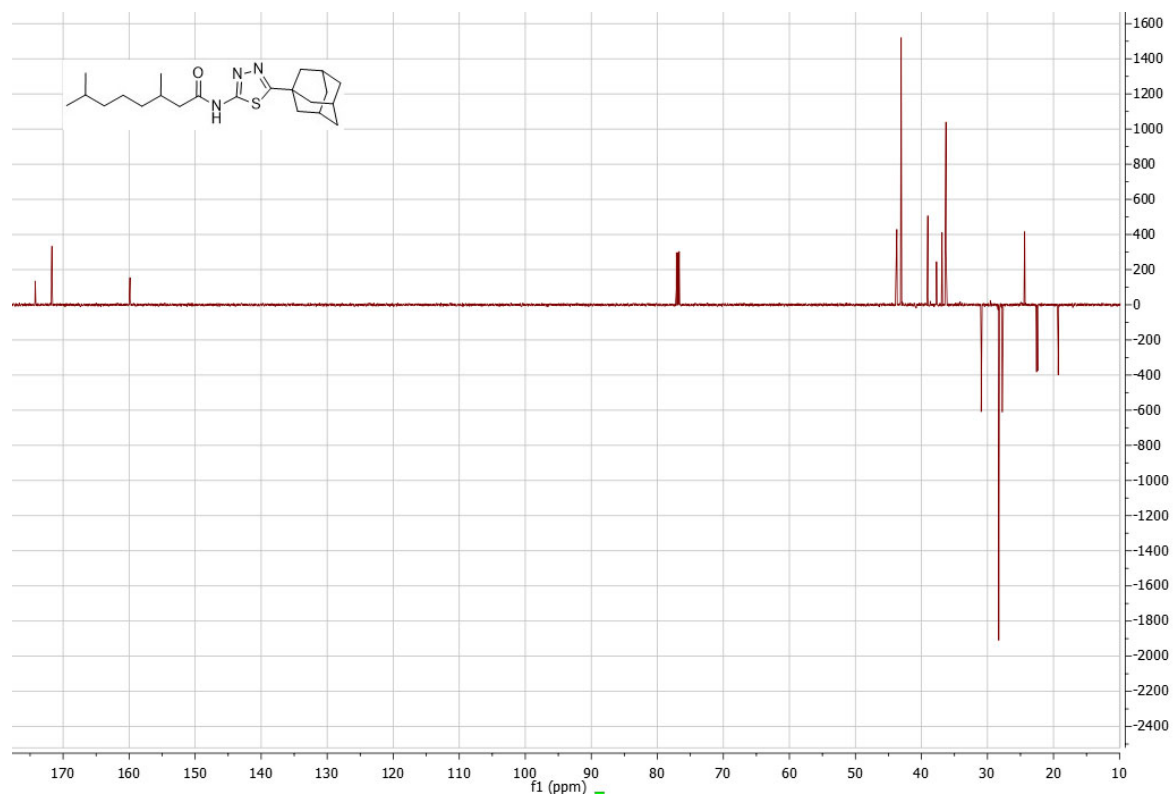



**Figure S28: DFS spectrum of compound 25a**

maa-112-1-2a #14 RT: 0.77 AV: 1 NL: 4.05E6  
T: + c EI Full ms [32.50-400.50]

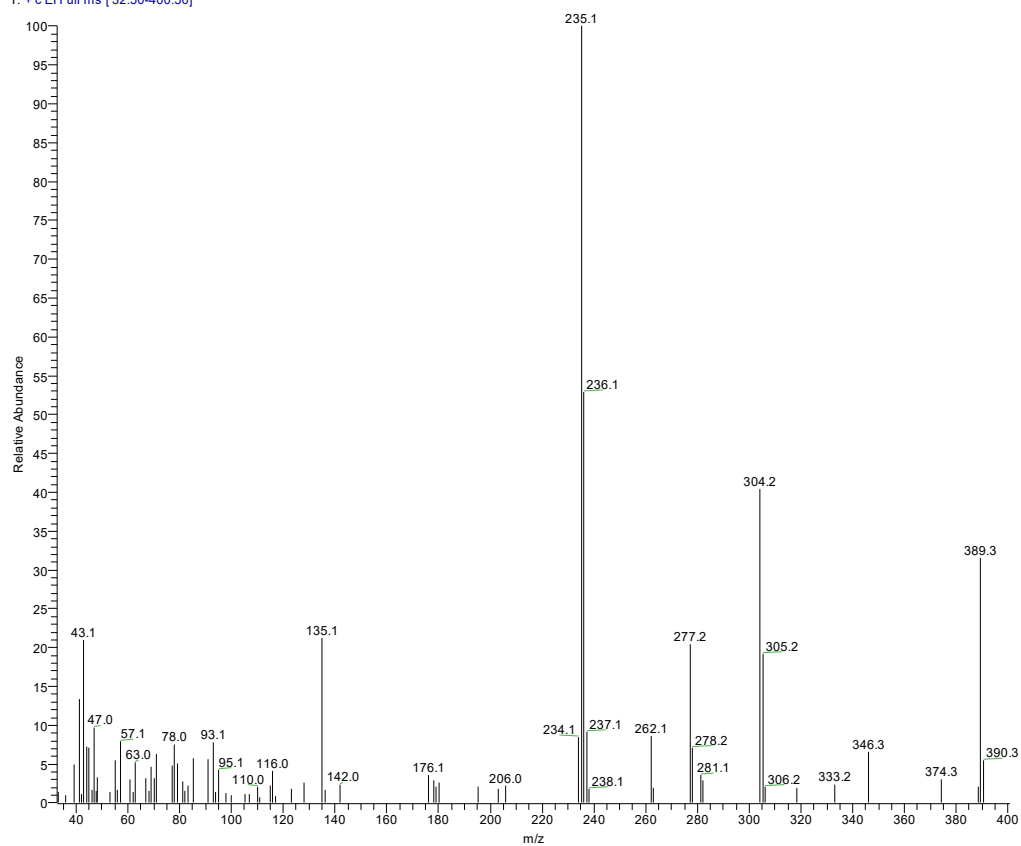

**Figure S29:  $^1\text{H}$  NMR of compound 25b**

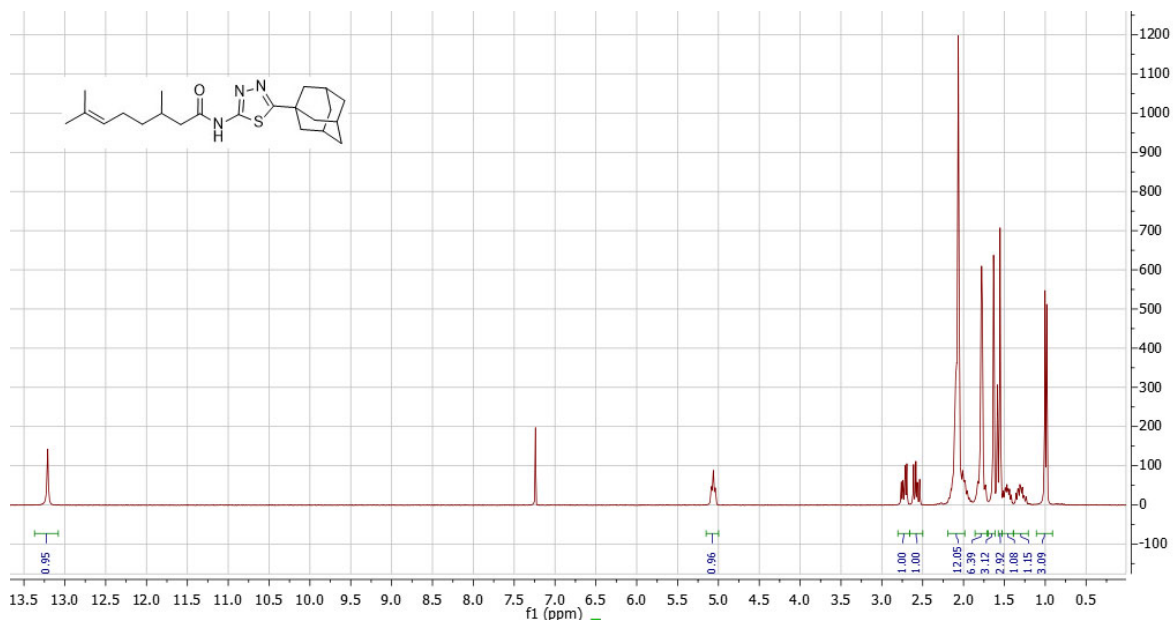

**Figure S30:**  $^{13}\text{C}$  NMR of compound **25b**

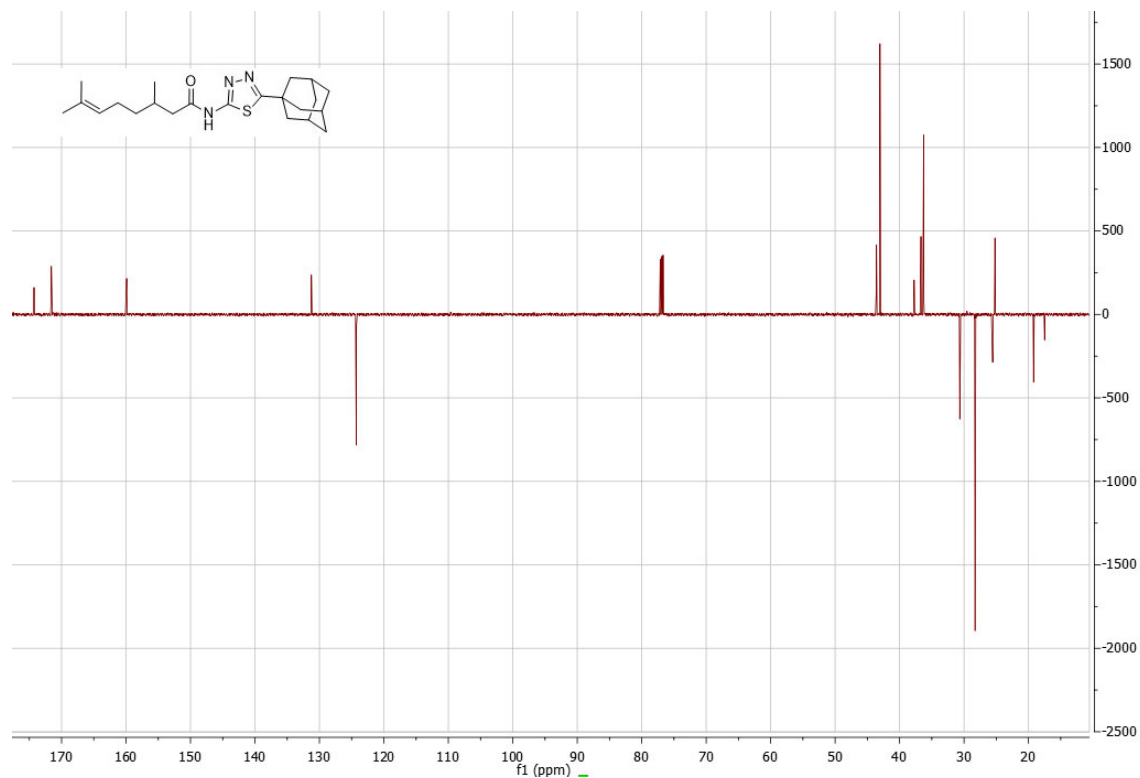

**Figure S31:** DFS spectrum of compound **25b**

maa-97\_181228111428 #16 RT: 0.88 AV: 1 NL: 1.48E6  
T: + c EI Full ms [32.50-400.50]

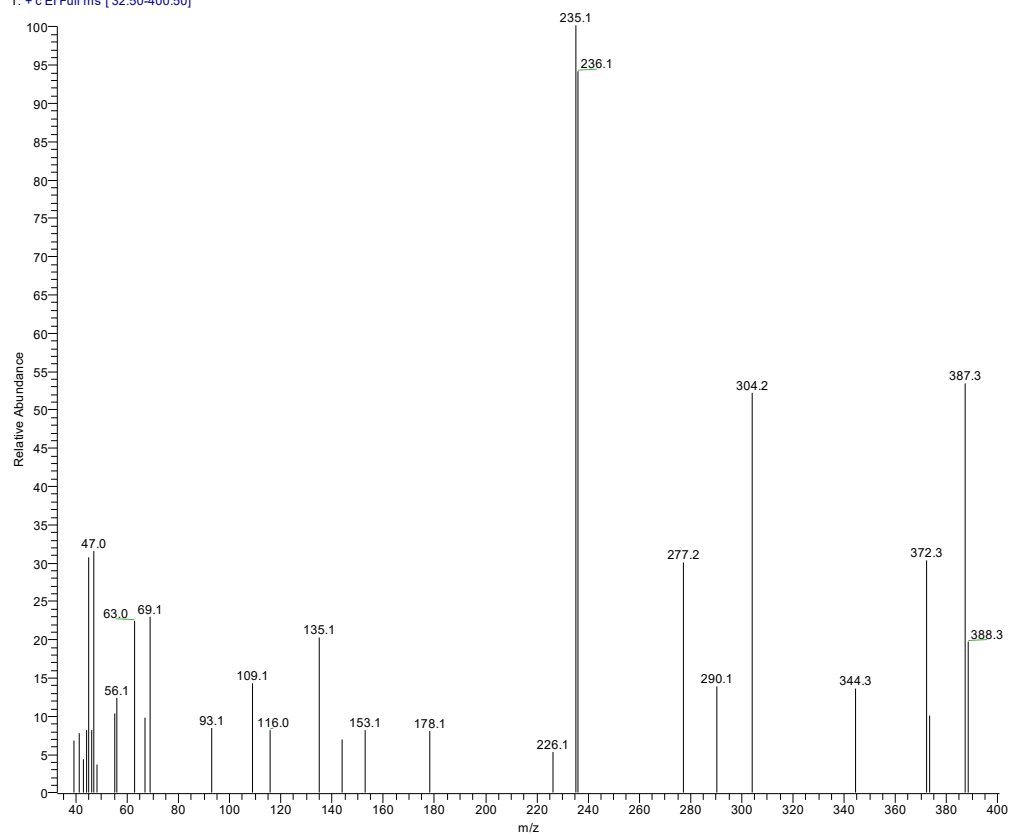

**Figure S32:**  $^1\text{H}$  NMR of compound **25c**

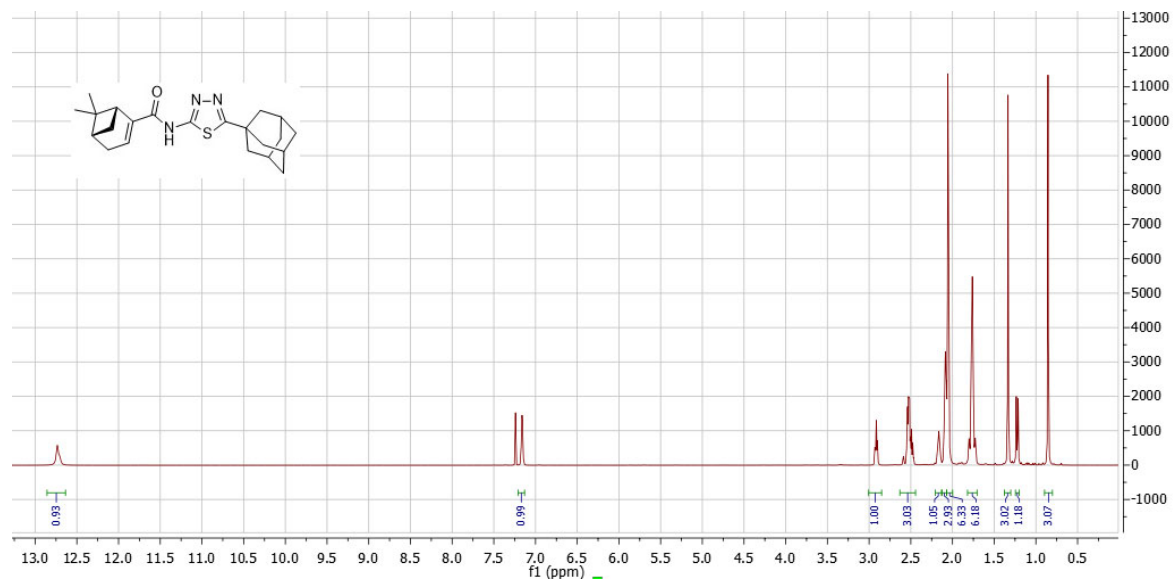

**Figure S33:**  $^{13}\text{C}$  NMR of compound **25c**

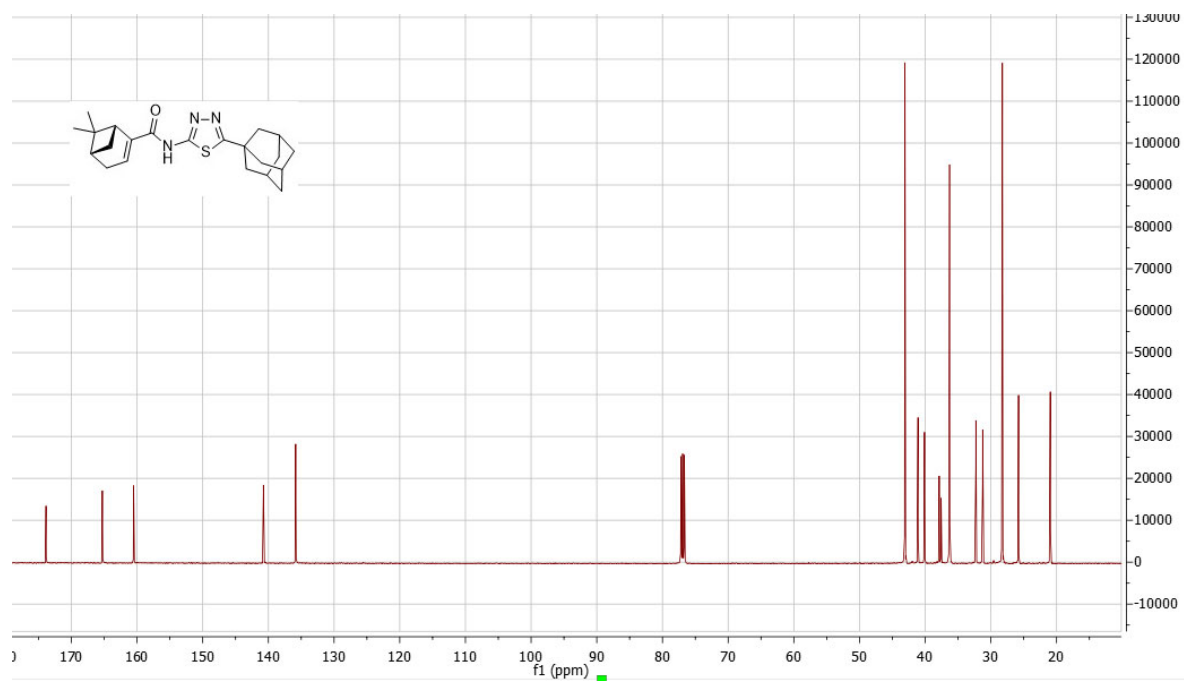

**Figure S34:** DFS spectrum of compound **25c**

maa-103\_181228103411 #8 RT: 0.49 AV: 1 NL: 1.52E7  
T: + c EI Full ms [32.50-420.50]

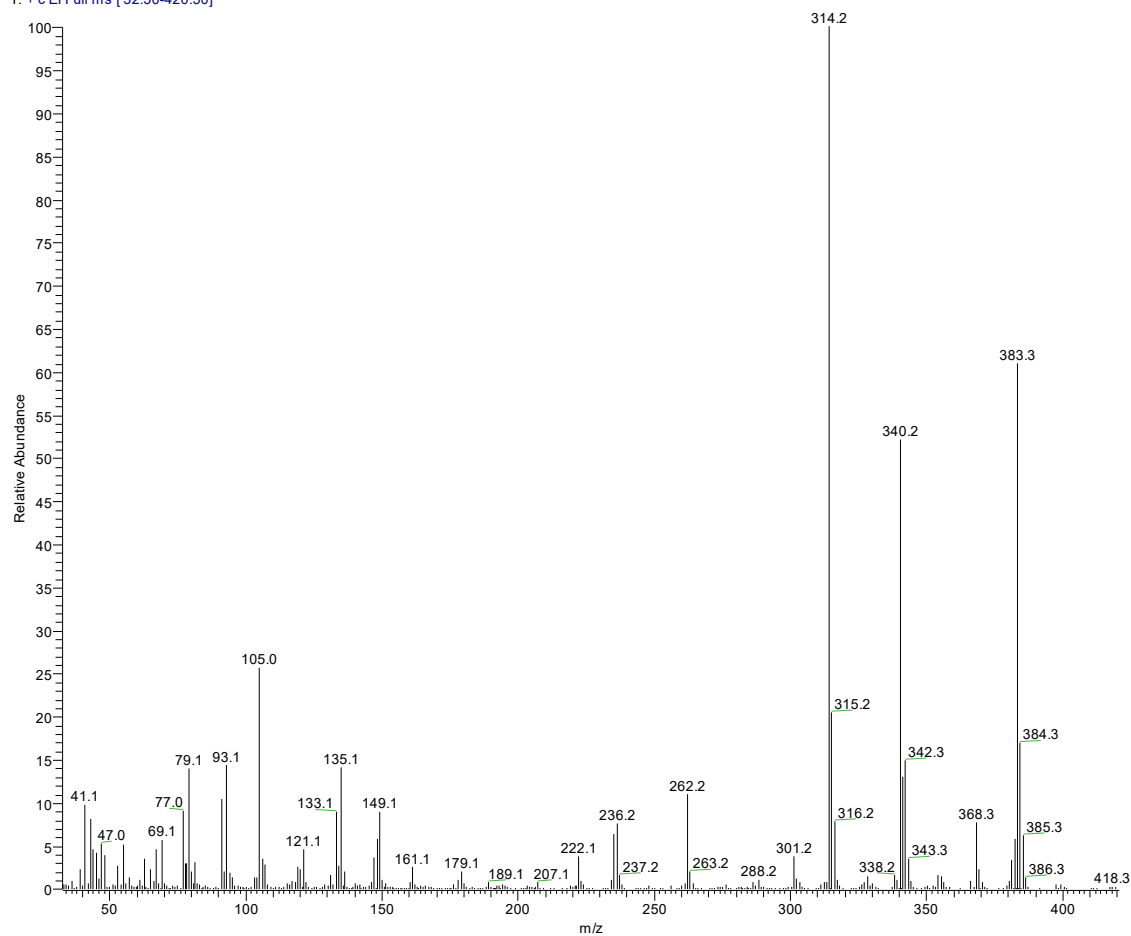

**Figure S35:**  $^1\text{H}$  NMR of compound **25d**

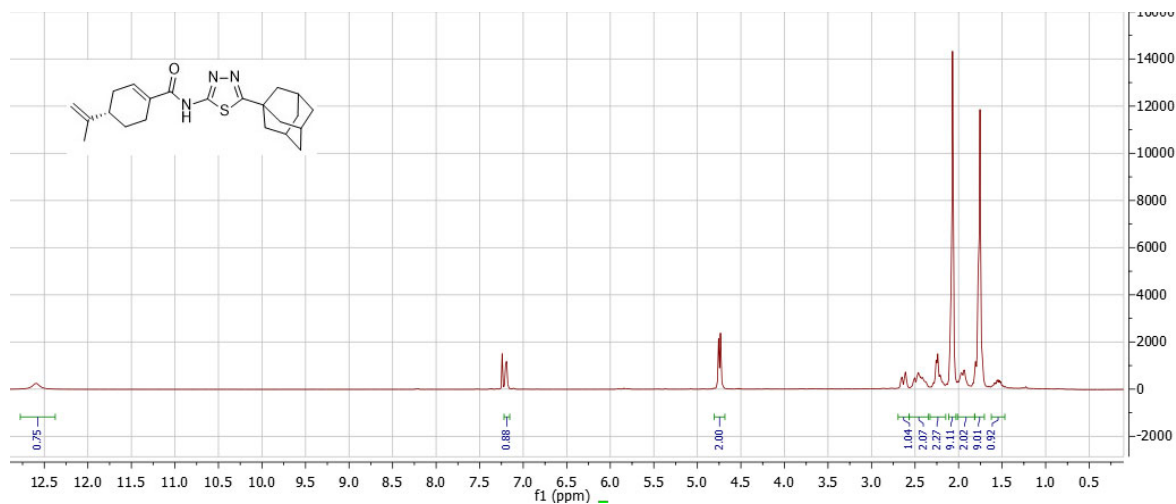

**Figure S36:**  $^{13}\text{C}$  NMR of compound **25d**

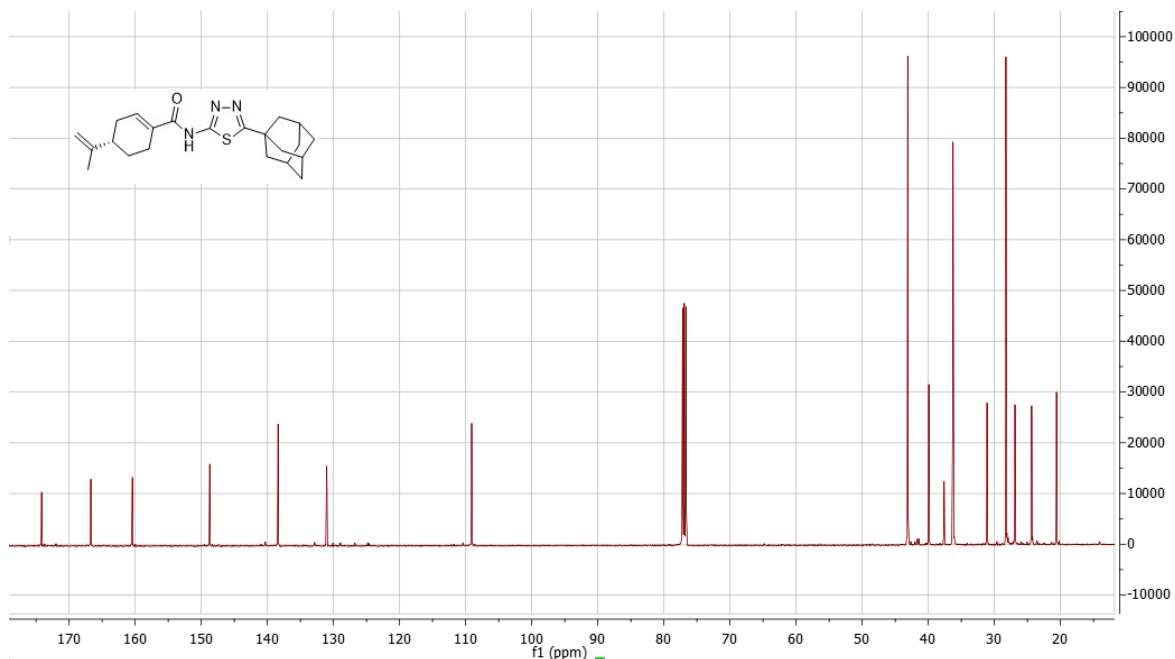

**Figure S37:** DFS spectrum of compound **25d**

maa-125p #6 RT: 0.38 AV: 1 NL: 4.61E6  
T: + c EI Full ms [ 14.50-400.50]

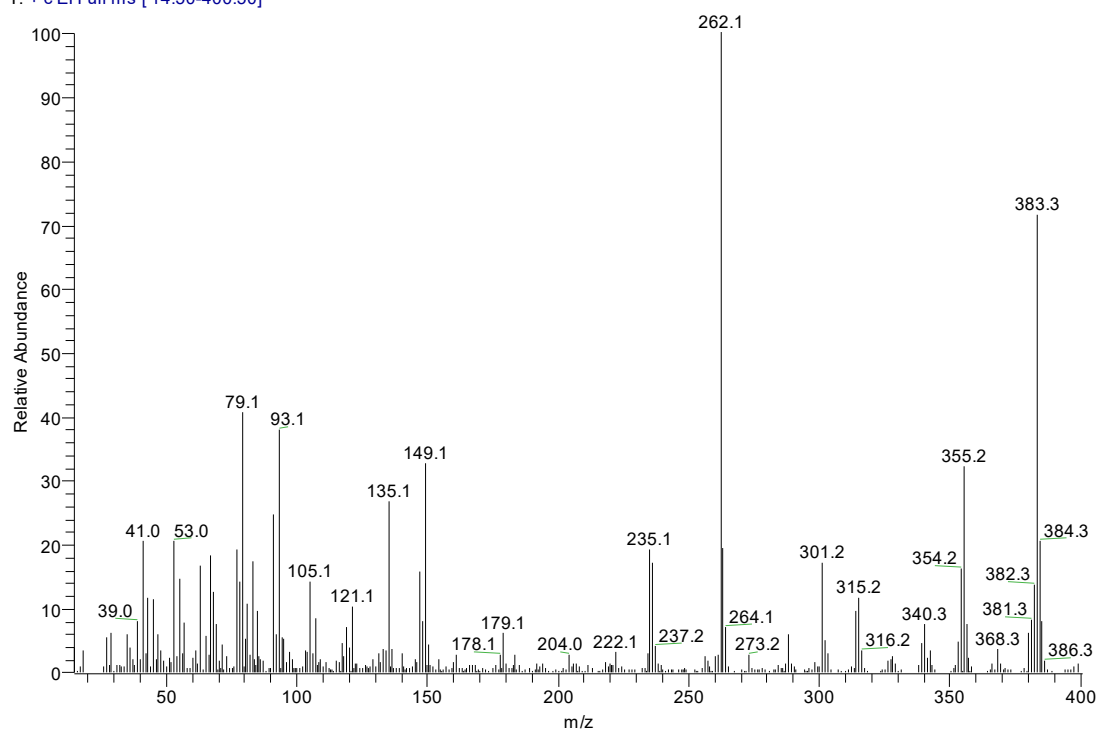

**Figure S38:**  $^1\text{H}$  NMR of compound **26a**

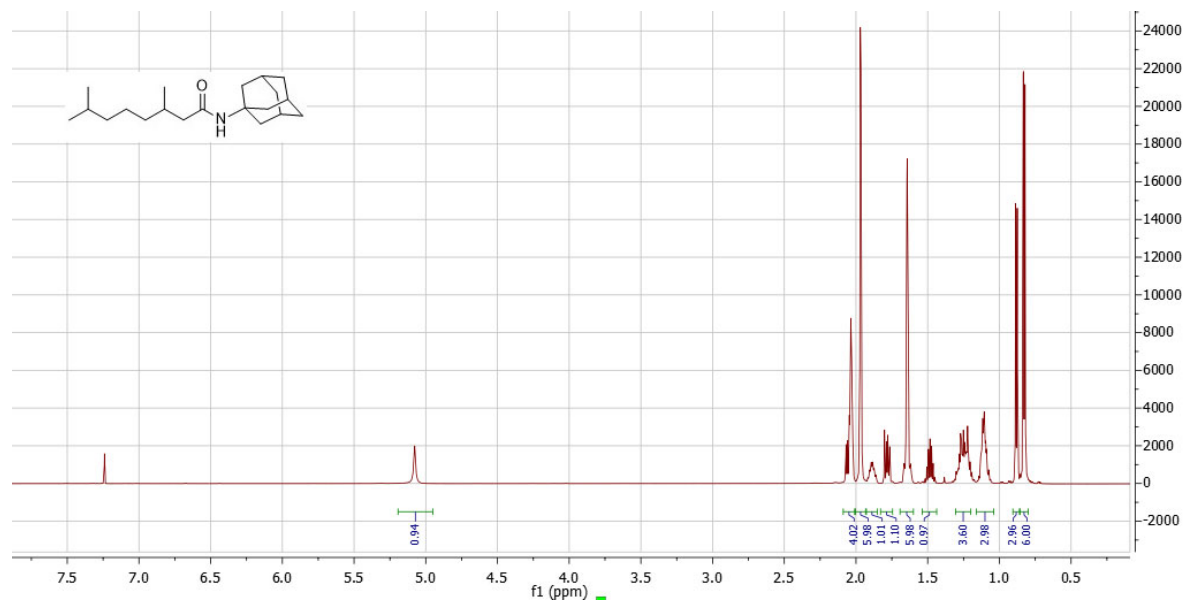

**Figure S39:**  $^{13}\text{C}$  NMR of compound **26a**

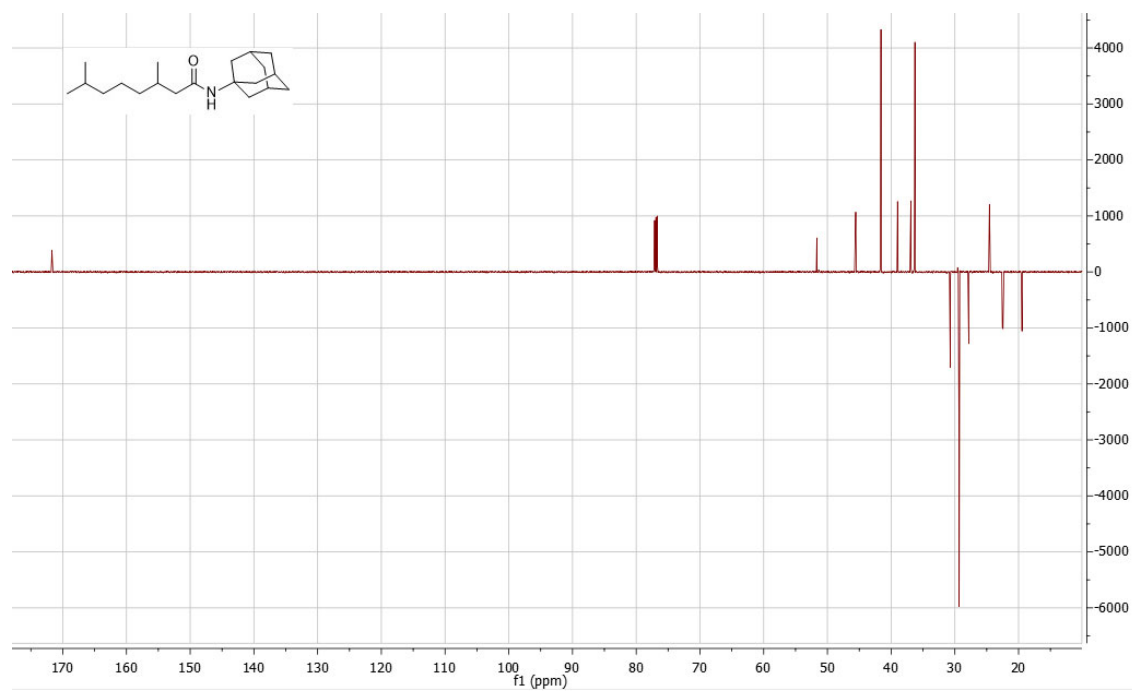

**Figure S40:** DFS spectrum of compound **26a**

ms-441 #2 RT: 0.06 AV: 1 NL: 7.28E7  
T: + c EI Full ms [32.50-330.50]

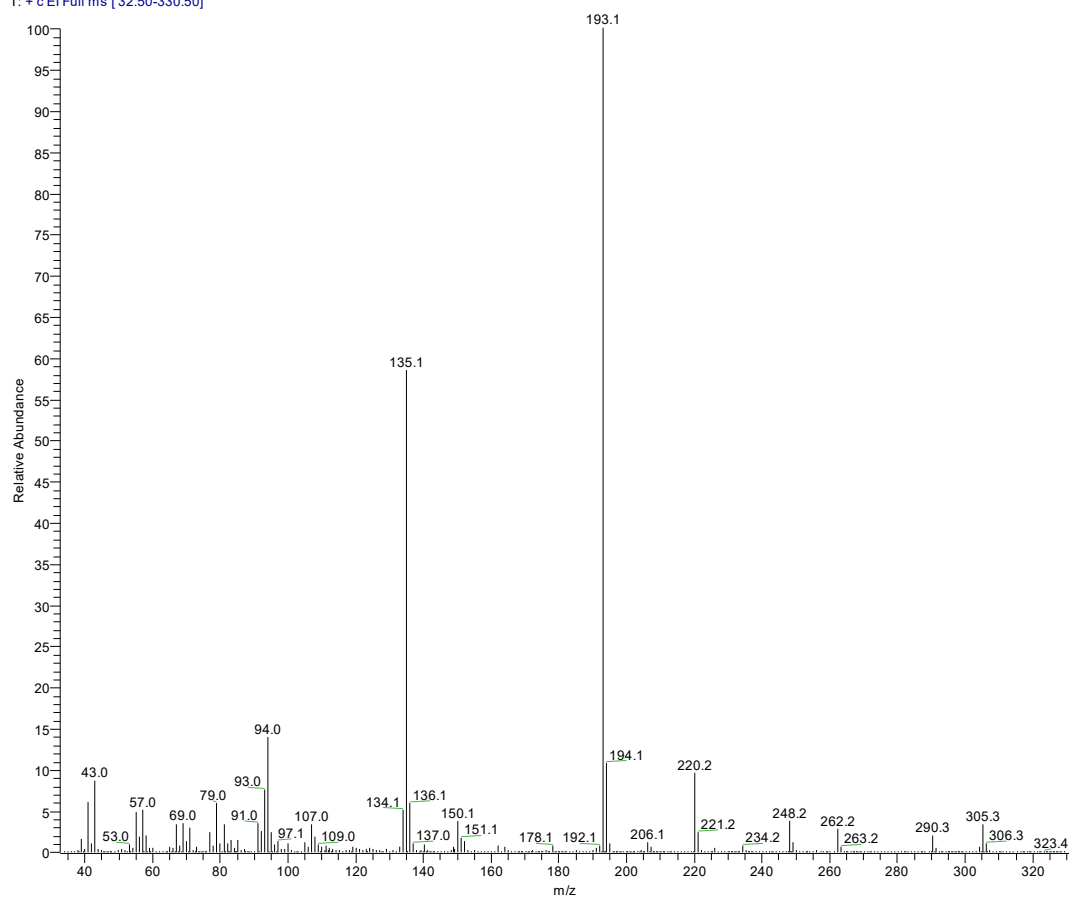

**Table S1.** The binding affinities as predicted by the scoring functions used.

| Ligands           | ASP      | CS       | ChemPLP  | GS       | IC <sub>50</sub> (μM) |
|-------------------|----------|----------|----------|----------|-----------------------|
| <b>20a</b>        | 32.8     | 27.4     | 60.5     | 69.0     | 0.54                  |
| <b>20b</b>        | 31.9     | 27.8     | 60.9     | 64.7     | 1.5                   |
| <b>20c</b>        | 32.1     | 27.9     | 62.6     | 70.2     | 5.3                   |
| <b>20d</b>        | 31.7     | 26.3     | 62.3     | 60.0     | 5.6                   |
| <b>20e</b>        | 32.3     | 27.6     | 61.0     | 68.0     | 6.2                   |
| <b>20f</b>        | 30.3     | 26.4     | 56.5     | 56.0     | 7.5                   |
| <b>20g</b>        | 31.3     | 27.8     | 58.6     | 55.8     | 0.57                  |
| <b>25a</b>        | 30.5     | 29.1     | 64.2     | 52.0     | 0.35                  |
| <b>25b</b>        | 28.5     | 27.7     | 63.0     | 54.4     | 2.59                  |
| <b>25c</b>        | 27.6     | 25.9     | 53.1     | 52.1     | 0.45                  |
| <b>28a</b>        | 27.2     | 27.5     | 57.4     | 49.1     | >15                   |
| <b>28g</b>        | 28.2     | 28.1     | 61.6     | 51.3     | >15                   |
| <b>26c</b>        | 22.8     | 25.7     | 47.5     | 43.3     | >15                   |
| <b>Av. Act</b>    | 30.9±1.6 | 27.4±0.9 | 60.3±3.2 | 60.2±6.8 |                       |
| <b>Av. &gt;15</b> | 26.1±2.3 | 27.1±1.0 | 55.5±5.9 | 47.9±3.4 |                       |



**Table S2:** The molecular descriptors and their corresponding Known Drug Indexes 2a and 2b (KDI<sub>2a/2b</sub>). The R<sup>2</sup> numbers derived do not contain the IC<sub>50</sub> > 15  $\mu$ M values.

| Ligands              | RB     | MW     | HD    | HA     | Log P | PSA    | KDI <sub>2A</sub> | KDI <sub>2B</sub> | IC <sub>50</sub> , $\mu$ M |
|----------------------|--------|--------|-------|--------|-------|--------|-------------------|-------------------|----------------------------|
| <b>20a</b>           | 8      | 375.6  | 1     | 2.5    | 6.6   | 41.8   | 4.82              | 0.23              | 0.54                       |
| <b>20b</b>           | 7      | 373.6  | 1     | 2.5    | 6.5   | 42.1   | 4.93              | 0.27              | 1.5                        |
| <b>20c</b>           | 6      | 371.6  | 1     | 2.5    | 6.4   | 42.0   | 5.02              | 0.30              | 5.3                        |
| <b>20f</b>           | 3      | 369.6  | 1     | 2.5    | 5.8   | 42.0   | 5.15              | 0.37              | 7.5                        |
| <b>20g</b>           | 4      | 383.6  | 1     | 2.5    | 6.1   | 41.5   | 5.11              | 0.34              | 0.57                       |
| <b>25c</b>           | 2      | 383.6  | 1     | 4.5    | 4.7   | 62.6   | 5.59              | 0.64              | 0.45                       |
| <b>20d</b>           | 6      | 371.6  | 1     | 2.5    | 6.4   | 41.4   | 5.02              | 0.30              | 5.6                        |
| <b>20e</b>           | 4      | 369.6  | 1     | 2.5    | 6.0   | 42.1   | 5.15              | 0.36              | 6.2                        |
| <b>28a</b>           | 8      | 319.5  | 1     | 2.5    | 5.1   | 34.2   | 4.99              | 0.32              | >15                        |
| <b>28g</b>           | 4      | 327.5  | 1     | 2.5    | 4.7   | 33.4   | 5.29              | 0.46              | >15                        |
| <b>26c</b>           | 2      | 299.5  | 1     | 2.5    | 4.8   | 31.9   | 5.10              | 0.37              | >15                        |
| <b>25a</b>           | 7      | 389.6  | 1     | 4.5    | 5.5   | 62.0   | 5.44              | 0.53              | 0.35                       |
| <b>25b</b>           | 6      | 387.6  | 1     | 4.5    | 5.4   | 61.8   | 5.53              | 0.59              | 2.59                       |
| <b>R<sup>2</sup></b> | 0.0758 | 0.5638 | 0.000 | 0.2267 | 0.054 | 0.2242 | 0.0498            | 0.0819            |                            |

**Table S3:** Definition of lead-like, drug-like and Known Drug Space (KDS) in terms of molecular descriptors. The values given are the maxima for each descriptor for the volumes of chemical space used.

|                                            | Lead-like Space | Drug-like Space | Known Drug Space |
|--------------------------------------------|-----------------|-----------------|------------------|
| Molecular weight (g mol <sup>-1</sup> )    | 300             | 500             | 800              |
| Lipophilicity (Log P)                      | 3               | 5               | 6.5              |
| Hydrogen bond donors (HD)                  | 3               | 5               | 7                |
| Hydrogen bond acceptors (HA)               | 3               | 10              | 15               |
| Polar surface area (Å <sup>2</sup> ) (PSA) | 60              | 140             | 180              |
| Rotatable bonds (RB)                       | 3               | 10              | 17               |
